1 **Title:** PREDICTION OF PRIMARY SOMATOSENSORY NEURON ACTIVITY  
2 DURING ACTIVE TACTILE EXPLORATION

3 **Authors:** Dario Campagner<sup>1</sup>, Mathew Evans<sup>1</sup>, Michael R. Bale<sup>1,2</sup>, Andrew Erskine<sup>1,3</sup>,  
4 Rasmus S. Petersen<sup>1</sup>

5 **Authors' affiliation:** 1. Faculty of Life Sciences, University of Manchester, Stopford  
6 Building, Oxford Road, Manchester M13 9PT, UK. 2. School of Life Sciences, University of  
7 Sussex, Brighton, BN1 9QG, UK 3. The Francis Crick Institute, Mill Hill Laboratory, The  
8 Ridgeway, Mill Hill, London, NW7 1AA.

9 **Correspondence to:** [r.petersen@manchester.ac.uk](mailto:r.petersen@manchester.ac.uk)

10

11

## 12 ABSTRACT

13 Primary sensory neurons form the interface between world and brain. Their function is well-  
 14 understood during passive stimulation but, under natural behaving conditions, sense organs  
 15 are under active, motor control. In an attempt to predict primary neuron firing under natural  
 16 conditions of sensorimotor integration, we recorded from primary mechanosensory neurons  
 17 of awake, head-fixed mice as they explored a pole with their whiskers, and simultaneously  
 18 measured both whisker motion and forces with high-speed videography. Using Generalised  
 19 Linear Models, we found that primary neuron responses were poorly predicted by whisker  
 20 angle, but well-predicted by rotational forces acting on the whisker: both during touch and  
 21 free-air whisker motion. These results are in apparent contrast to previous studies of passive  
 22 stimulation, but could be reconciled by differences in the kinematics-force relationship  
 23 between active and passive conditions. Thus, simple statistical models can predict rich neural  
 24 activity elicited by natural, exploratory behaviour involving active movement of the sense  
 25 organs.

26

27

## 28 INTRODUCTION

29 A major challenge of sensory neuroscience is to understand the encoding properties of  
 30 neurons to the point that their spiking activity can be predicted in the awake animal, during  
 31 natural behaviour. However, accurate prediction is difficult without experimental control of  
 32 stimulus parameters and, despite early studies of awake, behaving animals (Hubel, 1959),  
 33 subsequent work has most often effected experimental control by employing anaesthesia  
 34 and/or passive stimulation. However, the active character of sensation (Gibson, 1962; Yarbus  
 35 1967), based on motor control of the sense organs, is lost in reduced preparations. Recent  
 36 methodological advances permit a way forward: in the whisker system, it is now possible to  
 37 record neuronal activity from an awake mouse, actively exploring the environment with its  
 38 whiskers, whilst simultaneously measuring the fundamental sensory variables (whisker  
 39 kinematics and mechanics) likely to influence neuronal activity (O'Connor et al. 2010).

40 Our aim here was to predict spikes fired by primary whisker neurons (PWNs) of awake mice  
 41 engaged in natural, object exploration behaviour. The manner in which primary neurons  
 42 encode sensory information fundamentally constrains all downstream neural processing  
 43 (Lettvin et al. 1959). PWNs innervate mechanoreceptors located in the whisker follicles  
 44 (Zucker and Welker 1969; Rice et al. 1986). They are both functionally and morphologically  
 45 diverse; including types responsive to whisker-object contact and/or whisker self-motion  
 46 (Szwed et al. 2003; Ebara et al. 2002). PWNs project to the cerebral cortex, analogously to  
 47 other modalities, via trisynaptic pathways through the brainstem and thalamus (Diamond et  
 48 al. 2008).

49 Here, we show that PWN responses are well-predicted by rotational force ('moment') acting  
 50 on the whisker, while whisker angle is a poor predictor. Moment coding accounts for a  
 51 substantial amount of spiking during both whisker-object interaction and whisker motion in

52 air. Moment coding can also account for findings in previous studies of passive stimulation in  
53 the anaesthetized animal; indicating that the same biomechanical framework can account for  
54 primary somatosensory neurons responses across diverse states. Our results provide a  
55 mechanical basis for linking receptor mechanisms to tactile behaviour.

## 56 **RESULTS:**

### 57 **Primary whisker neuron activity during object exploration is predicted by whisker** 58 **bending moment**

59 We recorded the activity of single PWNs from awake mice (Figure 1A, E, Figure 1-figure  
60 supplement 1) as they actively explored a metal pole with their whiskers (N = 20 units). At  
61 the same time, we recorded whisker motion and whisker shape using high-speed videography  
62 (1000 frames/s; Figure1D, Video 1). As detailed below, PWNs were diverse, with some  
63 responding only to touch, others also to whisker motion. Since each PWN innervates a single  
64 whisker follicle, we tracked the ‘principal whisker’ of each recorded unit from frame to  
65 frame, and extracted both the angle and curvature of the principal whisker in each video  
66 frame (total 1,496,033 frames; Figure1B-E; Bale et al. 2015). Whiskers are intrinsically  
67 curved, and the bending moment on a whisker is proportional to how much this curvature  
68 changes due to object contact (Birdwell et al. 2007): we therefore used ‘curvature change’ as  
69 a proxy for bending moment (O’Connor et al. 2010a). Whisker-pole contacts caused  
70 substantial whisker bending (curvature change), partially correlated with the whisker angle  
71 (Figures 1E, 4E) and, consistent with Szwed et al. (2003) and Leiser and Moxon (2007),  
72 robust spiking (Figures 1E, 2E).

73 To test between candidate encoding variables, our strategy was to determine how accurately  
74 it was possible to predict PWN activity from either the angular position or curvature change  
75 of each recorded unit’s principal whisker. To predict spikes from whisker state, we used

76 Generalised Linear Models (GLMs; Figure 2A). GLMs, driven by whisker angle, have  
77 previously been shown to provide a simple but accurate description of the response of PWNs  
78 to passive stimulation (Bale et al. 2013) and have mathematical properties ideal for robust  
79 parameter-fitting (Truccolo et al. 2005; Paninski et al. 2007).

80 For each recorded unit (median 69,672 frames and 550 spikes per unit), we computed the  
81 GLM parameters that best predicted the unit's spike train given the whisker angle time series  
82 using half the data as a training set for parameter-fitting; 8 total fitted parameters - 5 for  
83 stimulus filter, 2 for history filter, 1 bias; Figure 2-figure supplement 3). We then assessed  
84 prediction performance using the other half of the data as a testing set: we provided the GLM  
85 with the whisker angle time series as input and calculated the predicted spike train, evoked in  
86 response (Material and Methods). We then compared the recorded spike train to the GLM-  
87 predicted one (Figure 2B-C) and quantified the similarity between the smoothed spike trains  
88 using the Pearson correlation coefficient (PCC). This is a stringent, single-trial measure of  
89 model prediction performance (Figure 2-figure supplement 1B). We then repeated this entire  
90 procedure for the whisker curvature time series. Although angle GLMs predicted spike trains  
91 of a few units moderately well (2/20 units had  $PCC > 0.5$ ), they performed poorly for the  
92 majority (median PCC 0.06, IQR 0.019-0.3; Figure 2B-D, orange). This was unlikely to be  
93 because of non-linear tuning to whisker angle, since quadratic GLMs fared only marginally  
94 better (median PCC 0.097, IQR 0.042-0.31;  $p=0.044$ , signed-rank test, Figure 2-figure  
95 supplement 1A). In contrast, we found that, at the population level, the curvature GLMs were  
96 substantially more accurate than the angle GLMs (median PCC 0.52, IQR 0.22-0.66;  
97  $p=0.0044$ , signed-rank test; Figure 2B-D, blue) with prediction accuracy up to PCC 0.88.  
98 Curvature GLMs also predicted spikes during touch episodes significantly more accurately  
99 (median PCC 0.57, IQR 0.23-0.72) than did angle GLMs during non-touch episodes (median  
100 0.06, IQR 0.02-0.35;  $p=0.005$ , signed-rank test). At the level of individual units, 90% had

101 above chance PCC and we termed these ‘curvature-sensitive’ (Material and Methods). Of the  
102 curvature-sensitive units, 61% were sensitive to positive curvature change and 39% to  
103 negative curvature change (Material and Methods).

104 The result that curvature predicted PWN responses better than angle was robust to the  
105 number of fitted parameters: a GLM sensitive to instantaneous curvature (4 parameters: 1  
106 stimulus filter parameter, 2 history filter parameters and 1 bias) exhibited very similar  
107 prediction accuracy (Figure 2-figure supplement 1C). The result was also robust to time-  
108 scale: prediction accuracy based on curvature was significantly greater than that based on  
109 angle for smoothing time-scales in the range 1-100ms (signed-rank test,  $p < 0.05$ , Bonferroni-  
110 corrected).

111 Although the activity of most units was better predicted by whisker curvature change than by  
112 whisker angle, there was significant variability in prediction performance, and there were a  
113 few units for which the angle prediction performance was appreciable (Figure 2D). However,  
114 we found that this could largely be attributed to redundancy. When a mouse whisks against  
115 an object, curvature change and angle fluctuate in concert (Birdwell et al. 2007; Bagdasarian  
116 et al. 2013; Pammer et al. 2013; Figures 1E, 4E and Figure 4F-G). When we fitted GLMs  
117 using both curvature change and angle as input, these GLMs predicted the spike trains no  
118 more accurately (median PCC 0.53 IQR 0.40-0.62;  $p = 0.067$ , signed-rank test; Figure 2D)  
119 than GLMs based on curvature change alone. Moreover, on a unit-by-unit basis, for 65% of  
120 units, curvature change GLMs predicted spikes better than angle (signed-rank test,  $p < 0.05$ ,  
121 Bonferroni corrected); only for 5% of units did angle predict spikes better than curvature  
122 change. GLMs based on curvature change also predicted spike trains more accurately than  
123 GLMs based on “push angle” – the change in angle as the whisker pushes against an object  
124 (Figure 1E; median PCC 0.25 IQR 0.04-0.45;  $p = 0.006$ , signed-rank test). Moreover,  
125 prediction accuracy of GLMs fitted with both push angle and curvature change (median PCC

126 0.52, IQR 0.2-0.69) inputs was no better than that of GLMs fitted with curvature alone ( $p =$   
127 0.43, signed-rank test)

128 In principle, neurons might also be sensitive to the axial force component (parallel to the  
129 whisker follicle) and/or lateral force component (orthogonal to axial) associated with  
130 whisker-object contact (Figure 1B-C, Figure 1-figure supplement 3; Solomon and Hartmann,  
131 2006; Pammer et al. 2013). We restricted our analysis to bending moment since, under our  
132 experimental conditions, axial/lateral force components were near-perfectly correlated with  
133 bending moment (Figure 2-figure supplement 2) and bending moment is likely to have a  
134 major influence on stresses in the follicle (Pammer et al. 2013).

135 To further test the curvature-encoding concept, we asked whether curvature GLMs could  
136 account for the response of PWNs to whisker-pole touch. To this end, we parsed the video  
137 data into episodes of ‘touch’ and ‘non-touch’. Units fired at a higher rate during touch than  
138 otherwise (Szwed et al. 2003; Leiser and Moxon, 2007). Without any further parameter-  
139 adjustment, the curvature-based GLMs reproduced this effect (Figure 2E): the correlation  
140 coefficient between recorded and GLM-predicted firing rate for touch episodes was 0.97.  
141 Collectively, the above results indicate that, during active touch, the best predictor of whisker  
142 primary afferent firing is not whisker angle but rather the bending moment.

143

#### 144 **Primary whisker neuronal activity during whisking is predicted by moment**

145 During free whisking - in the absence of whisker-pole contact - whisker curvature, and  
146 therefore bending moment, changed little (Figure 1E, Figure 4F); consistent with previous  
147 studies (Knutsen et al. 2008; Quist et al. 2014). Yet, 50% of recorded units (‘whisking-  
148 sensitive units’) were significantly modulated by whisking amplitude (Figure 3A). Consistent

149 with Szwed et al. (2003), PWNs were diverse: 45% were curvature-sensitive (significant PCC  
150 for curvature based GLM); 45% were both whisking and curvature sensitive and 5% were  
151 whisking sensitive but not curvature-sensitive.

152 The presence of whisking sensitivity suggests that moment due to whisker bending is not the  
153 only force that influences PWN activity. A likely candidate is the moment associated with the  
154 rotational acceleration of a whisker: this moment is proportional to the whisker's angular  
155 acceleration (Quist et al. 2014; Material and Methods). Consistent with this possibility, we  
156 found that whisking-sensitive units were tuned to angular acceleration (Figure 3B) and that  
157 50% of these were phase-modulated (Figure 3C). Angular acceleration tuning was diverse:  
158 some units fired to acceleration in a particular direction (rostral or caudal), whilst others  
159 responded to acceleration in both directions (Figure 3B, Figure 3-figure supplement 1).  
160 Moreover, for whisking-sensitive units (but not whisking-insensitive ones), quadratic GLMs  
161 trained on data from non-touch episodes were able to predict spikes using whisker angle  
162 acceleration as input (Figure 3D-E; whisking sensitive units, median PCC 0.37, IQR 0.18-  
163 0.58; non-whisking sensitive, median PCC -0.0071, IQR -0.035-0.041;  $p=0.0017$  rank-sum  
164 test for whisking-sensitive vs non whisking-sensitive units). For 70% of whisking-sensitive  
165 units, directional selectivity for acceleration was consistent with that for curvature. These  
166 findings indicate that, in the absence of whisker-object contact, responses of PWNs to  
167 whisking itself can be accounted for by sensitivity to the moment associated with angular  
168 whisker acceleration.

169

170 **Relation between kinematics and mechanics is different in active vs passive touch and**  
171 **has implications for neural encoding**



172 We found, during active object exploration, that curvature change, but not whisker angle,  
 173 predicts PWN firing. In apparent contrast, studies using passive whisker stimulation have  
 174 reported that PWNs encode whisker angle and its temporal derivatives (Zucker and Welker,  
 175 1969; Gibson and Welker, 1983; Lichtenstein et al. 1990; Jones et al. 2004; Arabzadeh et al.  
 176 2005; Bale and Petersen, 2009; Lottem and Azouz, 2011; Bale et al. 2013). We wondered  
 177 whether the discrepancy might be due to differences in whisker mechanics between passive  
 178 and active stimulation conditions. To test this, we analysed the relationship between angle  
 179 and curvature change during active touch and compared it to that during passive whisker  
 180 stimulation. During active pole exploration, angle and curvature change were, over all, only  
 181 loosely related (median correlation coefficient 0.20, IQR 0.079-0.39, Figures 4D-E).  
 182 Important contributory factors were that the angle-curvature relationship was both different  
 183 for touch compared to non-touch (Figure 4F) and dependent on object location (Figure 4G). In  
 184 contrast, during passive stimulation, whisker angle was near perfectly correlated with  
 185 curvature change (for C2, correlation coefficients 0.96 and 0.94 respectively; similar results  
 186 for C5; Figures 4C-D, Figure 4E, inset and Figure 4-figure supplement 2); consistent with  
 187 properties of cantilevered beams (Birdwell et al. 2007). Simulations confirmed that, due to  
 188 the tight relationship between the variables, a unit tuned only to curvature change can appear  
 189 tightly tuned to angle (Figure 4-figure supplement 1). The implication is that apparent  
 190 sensitivity to whisker angle under passive stimulation conditions can be accounted for by  
 191 moment-tuning.

192

## 193 **DISCUSSION**

### 194 **Prediction of spikes fired by sensory neurons under natural conditions**

195 In the endeavour to understand how neurons encode and process sensory information, there is  
 196 a basic tension between the desire for tight experimental control and the desire to study  
 197 animals under natural, unconstrained conditions. Theories of sensory encoding suggest that  
 198 neural circuits have evolved to operate efficiently under natural conditions (Simoncelli and  
 199 Olshausen, 2001; Reinagel 2001). Previous studies have succeeded in predicting/decoding  
 200 spikes evoked by passive presentation of natural sensory stimuli to anaesthetised/immobilised  
 201 animals (Lewen et al. 2001; Arabzadeh et al. 2005; Pillow et al. 2008; Mante et al. 2008;  
 202 Lottem and Azouz, 2011; Bale et al. 2013), but it has been difficult to extend this approach to  
 203 encompass natural, active movement of the sense organs. Here we have addressed this  
 204 general issue, taking advantage of experimental possibilities recently created in the whisker  
 205 system (O'Connor et al. 2010a), and the ability of computational methods, such as GLMs, to  
 206 uncover stimulus-response relationships even from data with complex statistical structure  
 207 (Paninski et al. 2007; Fairhall and Sompolinski, 2014). Our main finding was that responses  
 208 of PWNs, recorded as an awake mouse actively explores an object with its whiskers, can be  
 209 predicted from the forces acting on the whiskers. Given that, for each unit, we were  
 210 attempting to predict the entire ~70 s time course of activity, the variability of the behaviour  
 211 of untrained mice (O'Connor et al. 2010a), and the lack of trial-averaging as a noise  
 212 reduction strategy, it is remarkable that we found model prediction correlation coefficients up  
 213 to 0.88. A challenge of studying neural coding under unconstrained, awake conditions is that  
 214 sensory variables tend to correlate. A useful feature of the GLM training procedure is that it  
 215 takes such correlations into account. We found that, although whisker angle predicted spikes  
 216 for a subset of units, this effect was very largely explained by a curvature-coding model,  
 217 together with the correlation between angle and curvature.

218

## 219 **Mechanical framework for tactile coding**

220 Pushing a whisker against an object triggers spiking in many PWNs (Szwed et al. 2003,  
221 2006; Leiser and Moxon, 2007). Biomechanical modelling by Hartmann and co-workers  
222 accounts for this by a framework where the whisker is idealised as an elastic beam,  
223 cantilever-mounted in the skin (Birdwell et al. 2007; Quist et al. 2014). When such a beam  
224 pushes against an object, the beam bends, causing reaction forces at its base. Our data are in  
225 striking agreement with the general suggestion that mechanoreceptor activity is closely  
226 related to such reaction forces. Our results show that curvature change associated both with  
227 contact-induced whisker bending and with whisker rotation predicts PWN spiking. Our  
228 results also provide a mechanical basis for previous findings: our finding of subtypes of  
229 curvature-only and curvature-acceleration PWNs is consistent with previous reports of  
230 ‘touch’ and ‘whisking-touch’ units (Szwed et al. 2003; 2006). Thus, a common framework  
231 accounts for diverse PWN properties.

232 Our finding that whisker angle predicts PWN spikes poorly indicates that whisker angle can  
233 change without modulating mechanotransduction in the follicle. This is consistent with  
234 evidence that, during artificial whisking, the follicle-shaft complex moves as a rigid unit  
235 (Bagdasarian et al. 2013). In apparent contrast, previous studies using passive stimulation in  
236 anaesthetised animals have consistently reported a tight relationship between whisker  
237 kinematics and PWN response. In the cantilever whisker model, passively induced changes in  
238 whisker angle correlate highly with whisker bending. We confirmed that this applies to real  
239 whiskers *in vivo* and demonstrate that moment-sensitive units can thereby appear angle-  
240 tuned. In this way, moment-encoding can account for primary neuron responses not only  
241 during active touch but also under passive stimulation. More generally, our results highlight  
242 the importance of studying neurons under natural, active sensing conditions.

243 In this study, we considered PWN encoding under conditions of pole contact, since this is  
244 well-suited to reaction force estimation (O’Connor et al. 2010a; Pammer et al. 2013) and

involves object-stimulus interactions on a ~100 ms time-scale that is conducive to single-trial analysis. Since whisker bending is ubiquitous in whisking behaviour, it is likely that our finding of curvature sensitivity is a general one. However, prediction performance varied across units, suggesting that other force components may also be encoded. Other experimental conditions – for example, textured surfaces – may involve multiple force components (Quist and Hartmann 2012; Pammer et al. 2013; Bagdasarian et al. 2013) and/or encoding of information by spike timing on a finer time-scale (Panzeri et al. 2001; Petersen et al. 2001; Arabzadeh et al. 2005; Bale et al. 2015).

It is axiomatic that mechanoreceptors are sensors of internal forces acting in the tissue within which they are embedded (Abraira and Ginty, 2013) and therefore valuable to be able to measure mechanical forces in the awake, behaving animal. In general, including the important case of primate hand-use, the complex biomechanics of skin makes force-estimation difficult (Phillips and Johnson, 1981). In contrast, for whiskers, the quasi-static relationship is relatively simple: the bending moment on a whisker is proportional to its curvature and this has the important implication that reaction forces can be directly estimated from videography *in vivo* (Birdwell et al. 2007; O'Connor et al. 2010a; Pammer et al. 2013). Our results are the first direct demonstration that such reaction forces drive primary sensory neuron responses – likely involving Piezo2 ion channels (Woo et al. 2014; Poole et al. 2015; Whiteley et al. 2015) – and provide insight into how sensitivity to touch and self-motion arises in the somatosensory pathway (Szwed et al. 2003; Yu et al. 2006; Curtis and Kleinfeld, 2009; O'Connor et al. 2010b; Curtis and Kleinfeld, 2009; Huber et al. 2012; Petreanu et al. 2012; Peron et al. 2015).

## **Moment-based computations in tactile behaviour**

268 Extraction of bending moment is a useful first step for many tactile computations. Large  
 269 transients in bending moment signal object-touch events, and the magnitude of bending is  
 270 inversely proportional to the radial distance of contact along the whisker (Solomon and  
 271 Hartmann, 2006). As illustrated by our results on the statistics of active touch, if integrated  
 272 with cues for whisker self-motion, whisker bending can be a cue to the 3D location of an  
 273 object (Szwed et al. 2003, Szwed et al. 2006, Birdwell et al. 2007; Bagdasarian et al. 2013;  
 274 Pammer et al. 2013). Bending moment can permit wall following (Sofroniew et al. 2014) and,  
 275 if integrated across whiskers, can in principle be used both to infer object shape (Solomon  
 276 and Hartmann, 2006) and to map the spatial structure of the environment (Fox et al. 2012,  
 277 Pearson et al. 2013).

## 278 **Summary and Conclusion**

279 We have shown that the responses of primary whisker neurons can be predicted, during  
 280 natural behaviour that includes active motor control of the sense organ, from forces acting on  
 281 the whiskers. These results provide a bridge linking receptor mechanisms to behaviour.

282

## 283 MATERIAL AND METHODS

284 All experimental protocols were approved by both United Kingdom Home Office national  
285 authorities and institutional ethical review.

### 286 Surgical procedure

287 Mice (C57; N=10; 6 weeks at time of implant) were anesthetized with isoflurane (2% by  
288 volume in O<sub>2</sub>), mounted in a stereotaxic apparatus (Narishige) and body temperature  
289 maintained at 37°C using a homeothermic heating system. The skull was exposed and a  
290 titanium head-bar (19.1mm x 3.2mm x 1.3mm; O'Connor et al. 2010a) was first attached to  
291 the skull ~1 mm posterior to lambda (Vetbond), and then fixed in place with dental acrylic  
292 (Lang dental). A craniotomy was made (+0.5mm to -1.5mm posterior to bregma, 0mm to  
293 3mm lateral) and sealed with silicone elastomer. Buprenorphine (0.1 mg/kg) was injected  
294 subcutaneously for postoperative analgesia and the mouse left to recover for at least 5 days  
295

### 296 Behavioural apparatus

297 Mice were studied in a pole exploration apparatus adapted from O'Connor et al. (2010a) but  
298 were not trained on any task. A mouse was placed inside a perspex tube (inner diameter 32  
299 mm), from which its head emerged at one end, and immobilised by fixing the head-bar to a  
300 custom mount holder. The whiskers were free of the tube at all times. The stimulus object  
301 was a 1.59 mm diameter metal pole, located ~3.5mm lateral to the mouse's snout. To allow  
302 control of its anterior/posterior location, the pole was mounted on a frictionless linear slide  
303 (Schneeberger NDN 2-50.40) and coupled to a linear stepper motor (Zaber NA08B30). To  
304 allow vertical movement of the pole into and out of range of the whiskers, the pole/actuator  
305 assembly was mounted on a pneumatic linear slide (Festo SLS-10-30-P-A), powered by  
306 compressed air. The airflow was controlled by a relay (Weidmüller). In this way, the pole

307 moved rapidly ( $\sim 0.15$  s) into and out of range of the whiskers. The apparatus was controlled  
308 from Matlab via a real-time processor (TDT, RX8).

### 309 **Electrophysiology**

310 We recorded the activity of PWNs from awake mice in the following way. To permit reliable  
311 whisker tracking (see below), before each recording session, A, B and E whisker rows were  
312 trimmed to the level of the fur, under brief isoflurane anaesthesia. The trigeminal ganglion  
313 was targeted as previously described (Bale et al. 2015). The silicone seal was removed and a  
314 3/4 shank tungsten microelectrode array (FHC, recording electrodes  $8\text{M}\Omega$  at  $1\text{kHz}$ , reference  
315  $1\text{M}\Omega$ ; tip spacing  $\sim 500\text{ }\mu\text{m}$ ) was lowered through the brain (angle  $4^\circ$  to vertical in the  
316 coronal plane) using a micromanipulator (Scientifica, PatchStar) under isoflurane  
317 anaesthesia. Extracellular potentials were pre-amplified, digitised ( $24.4\text{ kHz}$ ), filtered (band  
318 pass  $300\text{--}3000\text{ Hz}$ ) and acquired continuously to hard disk (TDT, RZ5). The trigeminal  
319 ganglion was encountered  $6\text{--}7\text{ mm}$  vertically below the pial surface and whisker-response  
320 units identified by manual deflection of the whiskers with a small probe. Once a well-isolated  
321 unit was found, the whisker that it innervated (the ‘principal whisker’, PW) was identified by  
322 manual stimulation. To define the PW, we deflected not only untrimmed whiskers but also  
323 the stubs of the trimmed whiskers. Any unit whose PW was a trimmed whisker was ignored.  
324 At this point, anaesthesia was discontinued. Once the mouse was awake, we recorded  
325 neuronal activity during repeated presentations of the pole (‘trials’). Before the start of each  
326 trial, the pole was in the down position, out of reach of the whiskers. The pole was first  
327 moved anterior-posteriorly to a position chosen randomly out of a set of 11 possible  
328 positions, spanning a range  $\pm 6\text{ mm}$  with respect to the resting position of the base of the PW.  
329 A trial was initiated by activating the pneumatic slide relay, thus moving the pole up into the  
330 whisker field, where it remained for  $3\text{ s}$  before being lowered. At the end of a recording

331 session, the microelectrode array was withdrawn, the craniotomy sealed with silicone  
332 elastomer, and the mouse returned to its home cage.

### 333 **High-speed videography**

334 Using the method of O'Connor et al. (2010a) to image whisker movement/shape, whiskers  
335 ipsilateral to the recorded ganglion were illuminated from below using a high-power infrared  
336 LED array (940 nm; Roithner, LED 940-66-60) via a diffuser and condensing lens. The  
337 whiskers were imaged through a telecentric lens (Edmunds Optics, 55-349) mounted on a  
338 high speed camera (Mikrotron, LTR2; 1000 frames/s, 0.4 ms exposure time). The field of  
339 view of the whiskers was 350x350 pixels, with pixel width 0.057mm.

### 340 **Response to touch and non-touch events**

341 Mouse whisking behaviour during the awake recording was segmented into 'touch', and 'non-  
342 touch' episodes. Touches between the PW of each unit and the pole were detected manually  
343 in each frame of the high-speed video. A frame was scored as touch if no background pixels  
344 were visible between the pole silhouette and the whisker. Any frame not scored as a touch  
345 was scored as non-touch. Touch and non-touch firing rates for a given unit were computed by  
346 averaging activity over all corresponding episodes.

### 347 **Whisker tracking**

348 Since the trigeminal ganglion lacks topography, it is difficult to target units that innervate a  
349 specific whisker, and therefore desirable for a whisker tracker to be robust to the presence of  
350 multiple rows of whiskers. However, since neurons in the ganglion innervate individual  
351 whiskers, it is sufficient to track only one whisker (the PW) for each recorded neuron. To  
352 extract kinematic/mechanical whisker information, we therefore developed a whisker tracker  
353 ('WhiskerMan'; Bale et al. 2015) whose design criteria, different to those of other trackers  
354 (Perkon et al. 2011; Clack et al. 2012), were to: (1) be robust to whisker cross-over events;



(2) track a single, target whisker; (3) track the proximal segment of the whisker shaft. The shape of the target whisker segment was described by a quadratic Bezier curve  $\mathbf{r}(t,s)$  (a good approximation away from the zone of whisker-object contact; Quist and Hartmann, 2012; Pammer et al. 2013):  $\mathbf{r}(t,s) = [x(t,s), y(t,s)]$ , where  $x, y$  are horizontal/vertical coordinates of the image,  $s = [0, \dots, 1]$  parameterises  $(x,y)$  location along the curve and  $t$  is time. We fitted such a Bezier curve to the target whisker in each image frame using a local, gradient-based search. The initial conditions for the search were determined by extrapolating the solution curves from the previous two frames, assuming locally constant, angular velocity. The combination of the low-parameter whisker description and the targeted, local search makes the algorithm robust to whisker cross-over events. The ‘base’ of the target whisker was defined as the intersection between the extrapolated Bezier curve and the snout contour (estimated as described in Bale et al. 2015). The solution curve in each frame was visually checked and the curves manually adjusted to correct occasional errors.

### 368 Estimation of kinematic/force parameters

The whisker angle ( $\theta$ ) in each frame was measured as the angle between the tangent to the whisker curve at the base and the anterior-posterior axis (Figure 1B). Whisker curvature ( $\kappa$ ) was measured at the base as  $\kappa = \frac{x'y'' - x''y'}{(x'^2 + y'^2)^{3/2}}$ , where  $x', y'$  and  $x'', y''$  are the first and second partial derivatives of the functions  $x(s)$  and  $y(s)$  with respect to  $s$  (Figure 1B). Since reaction force at the whisker base reflects changes in whisker curvature, rather than the intrinsic (unforced) curvature (Birdwell et al. 2007), we computed ‘curvature change’  $\Delta\kappa = \kappa - \kappa_{\text{int}}$ , where  $\kappa_{\text{int}}$ , the intrinsic curvature, was estimated as the average of  $\kappa$  in the first 100 ms of the trial (before pole contact; O'Connor et al. 2010a). During free whisking, whisker angle oscillated with the characteristic whisking rhythm, but curvature changed little. The small changes in whisker curvature during free whisking were consistent with torsional effects

(Knutsen et al. 2008). We estimated the number of whisking cycles from the duration of touch/non-touch episodes and the whisking frequency: median 419 whisking cycles per unit during touch periods; 415 during non-touch periods.

Under conditions of whisking against a smooth surface, such as in the present study, the quasi-static framework of Birdwell et al. (2007) applies.  $\Delta\kappa$ , measured, at the base of a whisker, in horizontal given plane, is proportional to the component of bending moment in that plane. We used  $\Delta\kappa$  as a proxy for bending moment. Bending moment ( $M$ ), Axial ( $\vec{F}_{ax}$ ) and lateral forces ( $\vec{F}_{lat}$ ) at the whisker base were calculated, during periods of whisker-pole contact, using the method of Pammer et al. (2013), using published data on areal moment of inertia of mouse whiskers (Quist and Hartmann, 2012), along with whisker-pole contact location (see figure 1-figure supplement 3 for details). Pole location, in the horizontal plane, in each frame, was identified as the peak of a 2D convolution between the video image and a circular pole template. To localise whisker-pole contact, the whisker tracker was used to fit the distal segment of the whisker close to the pole, seeded by extrapolation from the whisker tracking solution for the proximal whisker segment, described above. Whisker-pole contact location was defined as the point where this distal curve segment was closest to the detected pole centre. Pole and contact locations were verified by visual inspection.

As expressed by Newton's second law of rotational motion, the moment – or torque – of a rigid body, rotating in a plane, is proportional to the body's angular acceleration. During free whisking, a whisker behaves approximately as a rigid body and, for the whiskers considered in this study, their motion is predominantly in the horizontal plane (Bermejo et al. 2002, Knutsen et al. 2008). Thus, to assess whether such a moment is encoded by PWNs, we measured angular whisker acceleration during free whisking as a proxy. Acceleration was

402 calculated from the whisker angle time series after smoothing with a Savitzky-Golay filter  
403 (polynomial order 5; frame size 31 ms).

404 Push angle – the change in angle as a whisker pushes against an object - was measured during  
405 touch epochs. For each touch episode, we determined the value of the angle in the frame  
406 before touch onset and subtracted this from the whisker angles during the touch.

#### 407 **Passive whisker deflection**

408 To determine how whiskers move/bend in response to passive deflection under anaesthesia, a  
409 mouse was anesthetized (isoflurane 2%) and placed in the head-fixation apparatus. Individual  
410 whiskers (C2 and C5 trimmed to 5 mm) were mechanically deflected using a piezoelectric  
411 actuator as previously described (Bale et al. 2013; Bale et al. 2015). All other whiskers were  
412 trimmed to the level of the fur. Each whisker, in turn, was inserted into a snugly fitting plastic  
413 tube attached to the actuator, such that the whisker entered the tube 2 mm from the face. Two  
414 stimuli were generated via a real-time processor (TDT, RX8): (1) a 10 Hz trapezoidal wave  
415 (duration 3 s, amplitude 8°); (2) Gaussian white noise (duration 3 s, smoothed by convolution  
416 with a decaying exponential: time constant 10 ms; amplitude SD 2.1 °). During the  
417 stimulation, the whiskers were imaged as detailed above (1000 frames/s, 0.2 ms exposure  
418 time).

#### 419 **Electrophysiological data analysis**

420 *Spike sorting*: Single units (N=20) were isolated from the extracellular recordings as  
421 previously described, by thresholding and clustering in the space of 3-5 principal components  
422 using a mixture model (Bale and Petersen, 2009). A putative unit was only accepted if (1) its  
423 inter-spike interval histogram exhibited a clear absolute refractory period and (2) its  
424 waveform shape was consistent between the anaesthetised and awake phases of the recording.

425 *Responses to whisking without touch:* To test whether a unit responded to whisking itself, we  
 426 extracted non-touch episodes as detailed above and computed time series of whisking  
 427 amplitude and phase by band-pass filtering the whisker angle time series (6-30Hz) and  
 428 computing the Hilbert transform (Kleinfeld and Deschênes 2011). Amplitudes were  
 429 discretised (30 equi-populated bins) and the spiking data used to compute amplitude tuning  
 430 functions. Phases for bins where the amplitude exceeded a given threshold were discretised (8  
 431 equi-populated bins) and used to construct phase tuning functions. To determine whether a  
 432 unit was significantly amplitude-tuned, we fitted a regression line to its amplitude tuning  
 433 curve and tested whether the slope was statistically significantly different to 0 ( $p=0.0025$ ,  
 434 Bonferroni corrected). To determine whether a unit was significantly phase-tuned, we  
 435 computed the maximum value of its phase tuning curve and compared this to the distribution  
 436 of maxima of chance tuning functions. Chance tuning functions were obtained by randomly  
 437 shifting the recorded spike sequences by 3000-8000 ms and recomputing tuning functions  
 438 (500 times). A unit was considered phase-tuned if its tuning function maximum (computed  
 439 using amplitude threshold of  $2^\circ$ ) exceeded the 95th percentile of the shuffled distribution.

440 Acceleration tuning curves were quantified, for each unit, as follows. First, an acceleration  
 441 tuning curve was estimated (as above). Units typically responded to both positive and  
 442 negative accelerations, but with unequal weighting between them. To capture this, we fitted  
 443 the following regression model to the tuning curve:

$$r_i = \mu_0 + \mu_1|a_i| + \mu_2\Delta_i + \mu_3\Delta_i|a_i|$$

444 Here, for each bin  $i$  of the tuning curve,  $r_i$  was the firing rate and  $a_i$  was the acceleration;  $\mu_0$   
 445  $\mu_1$ ,  $\mu_2$  and  $\mu_3$  were regression coefficients; the term  $\Delta_i$  ( $\Delta_i=1$  if  $a_i<0$ ,  $\Delta_i=0$  otherwise) allowed  
 446 for asymmetric responses to negative and positive acceleration. Based on its best-fitting  
 447 regression coefficients ( $p=0.05$ ), units were classified as: having ‘preference for negative

acceleration', if  $\mu_3$  was significantly  $>0$ ; having 'preference for positive acceleration', if  $\mu_3$  was significantly  $<0$ ; as having 'no preferred direction' if both  $\mu_1$  was significantly  $>0$ , and  $\mu_3$  was not significantly  $>0$ ; and as 'not acceleration sensitive' if neither  $\mu_1$  nor  $\mu_3$  were significantly  $>0$ .

*Generalised Linear Model (GLM)*: To investigate how well PWNs encode a given sensory variable (e.g., whisker angle, curvature), we fitted single unit activity to a GLM (Nelder and Wedderburn, 1972; Truccolo et al. 2005; Paninski et al. 2007), using methods similar to Bale et al. (2013). For each unit, a 'stimulus' time series ( $x$ ) (whisker angle or whisker curvature change) and a simultaneously recorded spike time series ( $n$ ) were discretized into 1 ms bins:  $x_t$  and  $n_t$  denote respectively the stimulus value and spike count (0 or 1) in bin  $t$ .

GLMs express how the expected spike count of a unit depends both on the recent stimulus history and on the unit's recent spiking history. The standard functional form of the model we used was:

$$y_t = f(\vec{k}^T \vec{x}_t + \vec{h}^T \vec{n}_t^* + b), \quad (1)$$

Here  $n_t^*$ , the output in bin  $t$ , was a Bernoulli (spike or no-spike) random variable. The probability of a spike in bin  $t$ ,  $y_t$ , depended on three terms: (1) the dot product between the stimulus history vector  $\vec{x}_t = (x_{t-L_k+1}, \dots, x_t)$  and a 'stimulus filter'  $\vec{k}$  (length  $L_k = 5$ ); (2) the dot product between the spike history vector  $\vec{n}_t^* = (n_{t-L_h+1}^*, \dots, n_t^*)$  and a 'spike history filter'  $\vec{h}_t$  (length  $L_h = 2$ ); (3) a constant  $b$ , which set the spontaneous firing rate.  $f(\cdot)$  was the logistic function  $f(z) = (1 + e^{-z})^{-1}$ . The preferred direction of the GLM is determined by the sign of the stimulus filter. Positive (negative)  $k$  coefficients tend to make positive (negative) stimuli trigger spikes. Since we found that GLM performance was just as good with  $L_k = 1$  as  $L_k = 5$  (Figure 2-figure supplement 1C), we used results from the  $L_k = 1$  case to define

471 selectivity to curvature change direction: positive  $k$  implies selectivity for positive curvature  
472 change; negative  $k$  selectivity for negative curvature change. When a whisker pushes against  
473 an object during protraction, curvature increases; when it pushes against an object during  
474 retraction, it decreases.

475 To consider whether units might encode multiple sensory variables (e.g., both whisker angle  
476 and whisker curvature change), we used a GLM with multiple stimulus history terms, one for  
477 each sensory variable:

$$y_t = f(\vec{k}_1^T \vec{x}_{t;1} + \vec{k}_2^T \vec{x}_{t;2} + \vec{h}_t^T \vec{n}^* + b)$$

478 Here the indices 1, 2 label the sensory variables.

479 Training and testing of the GLM was done using a cross-validation procedure. For each unit,  
480 half of the trials were assigned randomly to a training set and half to a testing set. The  
481 training set was used to fit the parameters ( $\vec{k}$ ,  $\vec{h}$  and  $b$ ), while the testing set was used to  
482 quantify the similarity between the spike train of the recorded unit and that predicted by the  
483 GLM. GLM fitting was achieved by finding the parameter values ( $\vec{k}$ ,  $\vec{h}$  and  $b$ ), which  
484 minimized a cost function consisting of the sum of the negative log-likelihood and a  
485 regularizing term  $-\alpha \|\vec{k}\|^2$ . For all units, model prediction performance on the test set was  
486 robust to variation of  $\alpha$  over several orders of magnitude:  $\alpha$  was therefore set to a standard  
487 value of 0.01. To quantify the performance of the model, the sensory time series of the testing  
488 set was used as input to the best-fitting GLM to generate a ‘predicted’ spike train in response.  
489 Both real and predicted spike trains were then smoothed by convolution with a 100 ms box-  
490 car filter and the similarity between them quantified by the Pearson correlation coefficient  
491 (PCC). For each unit, the entire training/testing procedure was repeated for 10 random  
492 choices of training/testing set and the final prediction accuracy defined as the median of the

10 resulting PCC values. Data from these 10 samples were also used to test whether an individual unit exhibited statistically significant prediction performance for different sensory features. To test whether the results were robust to the smoothing time-scale, the above procedure was repeated for a range of box-car smoothing filters (1, 5, 10, 20, 50, 70 ms). To test whether a given ‘actual’ PCC was statistically significant, we tested the null hypothesis that it could be explained by random firing at the same time-averaged rate as that of the recorded unit. To this end, the recorded spike sequences were randomly shifted by 3000-8000 ms and the training/testing procedure above applied to this surrogate data. This was repeated 10 times and the resulting chance PCCs compared to the actual PCC using a signed-rank test,  $p=0.0025$  (Bonferroni corrected). This analysis was used to classify units as being ‘curvature-sensitive’.

*Quadratic GLM:* To test whether the units might exhibit nonlinear dependence on the stimulus parameters, we adapted the GLM defined above (equation 1) to include quadratic stimulus variables (Rajan et al. 2013). This was important to assess whisker angular acceleration during free whisking, since a subset of units exhibited U-shaped acceleration tuning functions (Figure 3B). Given a stimulus time series  $x_t$ , the quadratic stimulus history vector was  $[x_{t-Lk+1}, \dots, x_t, x_{t-Lk+1}^2, \dots, x_t^2]$ . Fitting methods were otherwise identical to those detailed above.

*Effect of angle-curvature correlations on apparent neuronal stimulus encoding in the passive stimulation protocol:* If, in a given recording, sensory variable X correlates with sensory variable Y, a neuron responsive purely to X will tend to appear tuned to Y. To investigate whether such an effect might produce apparent sensitivity to whisker angle in the passive stimulation paradigm, we simulated the response of curvature-tuned neurons to the whisker curvature change time series measured during passive white noise stimulation. To minimise free parameters, constrained GLMs (4 free parameters) were used, sensitive either to

instantaneous curvature ( $\vec{k} = [\gamma]$ ) or to its first order derivative ( $\vec{k} = \gamma [-1 \ 1]$ ), where  $\gamma$  was a signed, gain parameter. Parameters ( $\vec{h}$ ,  $b$ ,  $\gamma$ ) were adjusted to produce two spike trains (one for training, the other for testing) with a realistic white noise induced firing rate (~50 spikes/s; Bale et al. 2013). We then attempted to predict the simulated, curvature-evoked (training) spike train by fitting GLMs (length 5 stimulus filter, 8 free parameters) using as input either angle or curvature change. Cross-validated model accuracy was computed as the PCC between the predicted spike train and the testing spike train (both smoothed by convolution with a 5 ms box-car).

*Effect of single-trial approach on GLM prediction performance:* The objective of encoding models, such as GLMs, is to obtain an accurate description of the mapping between a stimulus and the neuronal spike trains it evokes. Since the random component of a neuron's response is inherently unpredictable, the best any model can do is to predict the probability of the spike train. To enable this, encoding models have generally (with few exceptions; Park et al. 2014) been applied to a 'repeated-trials' paradigm, where a stimulus sequence (e.g., frozen white noise) is repeated on multiple 'trials' (Arabzadeh et al. 2005; Lottem and Azouz, 2011; Bale et al. 2013; Petersen et al. 2008; Pillow et al. 2008). Model accuracy can then be quantified, largely free of contamination from random response variability, by comparing (using PCC or otherwise) the trial-averaged response of the model to the trial-averaged response of the neuron.

In contrast, in the present study of awake, actively whisking mice, the precise stimulus (time series of whisker angle/curvature) was inevitably different on every pole presentation: there were no precisely repeated trials to average over. Our standard model performance metric (PCC) was computed by comparing the response on a single long, concatenated 'trial' the



541 corresponding GLM predicted response. Such a PCC is downwards biased by random  
542 response variability.

543 To gauge the approximate magnitude of this downward bias, we used a simulation approach.  
544 By simulating the response of model neurons, we could deliver identical, repeated trials and,  
545 thereby compare model prediction performance by a metric based on trial-averaging with that  
546 based on the single-trial approach. To this end, for each recorded unit, we used the best-  
547 fitting curvature change GLM to generate 100 trials of spike trains evoked by the curvature  
548 time series measured for that unit. Data from the first of these trials was used to fit the  
549 parameters of a minimal ‘refitted GLM’ (stimulus filter length 1, spike history filter length 2;  
550 bias; total 4 free parameters), and the single-trial performance quantified, using the approach  
551 of the main text (Figure 2-figure supplement 1B, left). Next, we used the refitted GLM to  
552 generate 100 repeated trials of spike trains evoked by the curvature time series. Repeated-  
553 trials performance was then quantified as the PCC between PSTHs obtained by trial-  
554 averaging (Figure 2, -figure supplement 1B, right).

555 **ACKNOWLEDGEMENTS:**

556 We thank S. Fox, M. Humphries, M. Loft, R. Lucas, M. Montemurro and M. Maravall for  
557 comments on the manuscript/discussion; K. Svoboda for sharing behavioural methods; G.  
558 Caspani, K. Chlebikova, B. Nathanson and R. Twaites for assistance with whisker tracking.

559

560 **AUTHOR CONTRIBUTIONS:**

561 DC and RSP designed the study. DC and AE performed the experiments. DC, MHE and RSP  
562 analyzed the data. MRB, AE, DC and RSP developed the experimental methods. DC, MHE  
563 and RSP wrote the manuscript, with input from all authors.

564

565 **CONFLICT OF INTERESTS:**

566 The authors declare no competing financial interests.

567

## 568 REFERENCES

- 569 Abaira VE and Ginty DD. 2013. The sensory neurons of touch. *Neuron*, **79**: 618-639.  
570 doi:10.1016/j.neuron.2013.07.051
- 571 Arabzadeh E, Zorzin E and Diamond ME. 2005. Neuronal encoding of texture in the whisker  
572 sensory pathway. *PLoS Biol*, **3**:e17.doi: 10.1371/journal.pbio.0030017
- 573 Bagdasarian K, Swed M., Knutsen PM, Deutsch D, Derdikman D, Pietr M, Simony E. and  
574 Ahissar E. 2013. Pre-neuronal morphological processing of object location by individual  
575 whiskers. *Nat Neurosci*, **16**:622-631. doi:10.1038/nn.3378
- 576 Bale MR and Petersen RS. 2009. Transformation in the neural code for whisker deflection  
577 direction along the lemniscal pathway. *J Neurophysiol*, **102**:2771-2780. doi:  
578 10.1152/jn.00636.2009
- 579 Bale MR, Campagner D, Erskine A and Petersen RS. 2015. Microsecond-Scale Timing  
580 Precision in Rodent Trigeminal Primary Afferents, *J Neurosci*, **35**: 5935-5940. doi:  
581 10.1523/JNEUROSCI.3876-14.2015
- 582 Bale MR, Davies K, Freeman OJ, Ince RA and Petersen RS. 2013. Low-dimensional sensory  
583 feature representation by trigeminal primary afferents. *J Neurosci*, **33**: 12003-12012. doi:  
584 10.1523/JNEUROSCI.0925-13.2013
- 585 Bermejo R, Vyas A, and Zeigler HP. 2002. Topography of rodent whisking-I. Two-  
586 dimensional monitoring of whisker movements. *Somatosens Mot Res*, **19**(4): 341-346.doi:  
587 10.1080/0899022021000037809

588 Birdwell JA, Solomon JH, Thajchayapong M, Taylor, MA, Cheely M, Towal RB, Conradt J  
589 and Hartmann MJZ. 2007. Biomechanical models for radial distance determination by the rat  
590 vibrissal system. *J Neurophysiol*, **98**:2439–2455. doi: 10.1152/jn.00707.2006

591 Clack NG, O'Connor DH, Huber D, Petreanu L, Hires A, Peron S, Svoboda K, Myers EW.  
592 2012. Automated tracking of whiskers in videos of head fixed rodents. *PloS Comput Biol*,  
593 **8**:e1002591. doi: 10.1371/journal.pcbi.1002591

594 Curtis JC and Kleinfeld D. 2009. Phase-to-rate transformations encode touch in cortical  
595 neurons of a scanning sensorimotor system. *Nat Neurosci*, **12**(4): 492-  
596 501. doi:10.1038/nrn.2283

597 Diamond ME, von Heimendahl M, Knutsen PM, Kleinfeld D and Ahissar E. 2008. 'Where'  
598 and 'what' in the whisker sensorimotor system. *Nat Rev Neurosci*, **9**(8): 601-612.  
599 doi:10.1038/nrn2411

600 Ebara S, Kumamoto K, Matsuura T, Mazurkiewicz JE and Rice FL. 2002. Similarities and  
601 differences in the innervation of mystacial vibrissal follicle–sinus complexes in the rat and  
602 cat: a confocal microscopic study. *J Comp Neurol*, **449**(2), 103-119. doi: 10.1002/cne.10277

603 Fairhall A and Sompolisky H. 2014. Editorial overview: theoretical and computational  
604 neuroscience. *Curr Opin Neurobiol*, **25**:1:236. doi:10.1016/j.conb.2014.02.010

605 Fox C, Evans M, Pearson M, and Prescott T. 2012. Tactile SLAM with a biomimetic  
606 whiskered robot. In *IEEE International Conference on in robotics and automation (ICRA)*,  
607 4925-4930.

608 Gibson JJ. 1962. Observations on active touch. *Psychological Rev*, **69**: 477-491.

609 Gibson JM and Welker WI. 1983. Quantitative studies of stimulus coding in first-order  
610 vibrissa afferents of rats. 1. Receptive field properties and threshold distributions. *Somatosens*  
611 *Mot Res*, **1**:51-67. doi: 10.3109/07367228309144540

612 Hubel DH. 1959. Single unit activity in striate cortex of unrestrained cats. *J Physiol*, **147**:  
613 226-238. doi: 10.1113/jphysiol.1959.sp006238

614 Huber D, Gutnisky D, Peron S, O'Connor DH, Wiegert J. S., Tian L., Oertner T. G., Looger  
615 L. L., and Svoboda K. 2012. Multiple dynamic representations in the motor cortex during  
616 sensorimotor learning. *Nature*, **484**: 473-478. doi: 10.1038/nature11039

617 Jones LM, Depireux DA, Simons DJ and Keller A. 2004. Robust temporal coding in the  
618 trigeminal system. *Science*, **304**: 1986-1989. doi: 10.1126/science.1097779

619 Khatri V, Bermejo R, Brumberg JC, Keller A and Zeigler HP. 2009. Whisking in air:  
620 encoding of kinematics by trigeminal ganglion neurons in awake rats. *J Neurophysiol*, **101**:  
621 1836-1846. doi: 10.1152/jn.90655.2008.

622 Kleinfeld D and Deschênes M. 2011. Neuronal basis for object location in the vibrissa  
623 scanning sensorimotor system. *Neuron*, **72**:455-468. doi: 10.1016/j.neuron.2011.10.009.

624 Knutsen PM, Biess A and Ahissar E. 2008. Vibrissal kinematics in 3D: tight coupling of  
625 azimuth, elevation, and torsion across different whisking modes. *Neuron*, **59**: 35-42.

626 Leiser SC and Moxon KA. 2007. Responses of trigeminal ganglion neurons during natural  
627 whisking behaviors in the awake rat. *Neuron*, **53**: 117-133. doi:10.1016/j.neuron.2006.10.036.

628 Lettvin JY, Maturana HR, McCulloch WS and Pitts WH. 1959. What the frog's eye tells the  
629 frog's brain. *Proc IRE*, **47**: 1940-1951.

630 Lewen GD, Bialek W, Steveninck RRDRV. Neural coding of naturalistic motion stimuli.  
631 *Network*, **12(3)**: 317:329.

632 Lichtenstein SH, Carvell GE, and Simons DJ. 1990. Responses of rat trigeminal ganglion  
633 neurons to movements of vibrissae in different directions. *Somatosens Mot Res*, **7**: 47-65.  
634 doi: 10.1152/jn.90511.2008

635 Lottem E and Azouz R. 2011. A unifying framework underlying mechanotransduction in the  
636 somatosensory system. *J Neurosci*, **31**: 8520-8532. doi: 10.1523/JNEUROSCI.6695-10.2011.

637 Mante V, Bonin V and Carandini M. Functional mechanisms shaping lateral geniculate  
638 responses to artificial and natural stimuli. *Neuron*, **58**: 625-638. doi:  
639 10.1016/j.neuron.2008.03.011

640 Nelder JA and Wedderburn RWM. 1972. Generalized linear models. *J R Statist SocSer A*,  
641 **135**: 370–384.

642 O'Connor DH, Clack NG, Huber D, Komiyama T, Myers EW and Svoboda K. 2010a.  
643 Vibrissa-based object localization in head-fixed mice. *J Neurosci*, **30**: 1947-1967. doi:  
644 10.1523/JNEUROSCI.3762-09.2010.

645 O'Connor DH, Peron SP, Huber D and Svoboda K. 2010b. Neural activity in barrel cortex  
646 underlying vibrissa-based object localization in mice. *Neuron*, **67**: 1048-1061. doi:  
647 <http://dx.doi.org/10.1016/j.neuron.2010.08.026>.

648 Pammer L, O'Connor DH, Hires SA, Clack NG, Huber D, Myers EW and Svoboda K. 2013.  
649 The mechanical variables underlying object localization along the axis of the whisker. *J*  
650 *Neurosci*, **33**: 6726-6741. doi:10.1523/JNEUROSCI.4316-12.2013.

651 Paninski L, Pillow J and Lewi J. 2007. Statistical models for neural encoding, decoding, and  
652 optimal stimulus design. *Prog Brain Res*, **165**: 493-507.doi:10.1016/S0079-6123(06)65031-0

653 Panzeri S, Petersen RS, Schultz SR, Lebedev M and Diamond ME. 2001. The role of spike  
654 timing in the coding of stimulus location in rat somatosensory cortex. *Neuron*, **29(3)**, 769-  
655 777.doi: 10.1016/S0896-6273(01)00251-3

656 Park IM, Meister ML, Huk AC and Pillow JW. 2014. Encoding and decoding in parietal  
657 cortex during sensorimotor decision-making. *Nat Neurosci*,**17**: 1395-1403. doi:  
658 doi:10.1038/nn.3800

659 Pearson MJ, Fox C, Sullivan JC, Prescott TJ, Pipe T and Mitchinson B. 2013. Simultaneous  
660 localization and mapping on a multi-degree of freedom biomimetic whiskered robot. In *IEEE*  
661 *International Conference on robotics and automation (ICRA)*, 586-592.doi:  
662 10.1109/ICRA.2013.6630633

663 Perkon I, Košir A, Itskov PM, Tasič J and Diamond ME. 2011. Unsupervised quantification  
664 of whisking and head movement in freely moving rodents. *J Neurophysiol*, **105**: 1950-  
665 1962.doi: 10.1152/jn.00764.2010.

666 Peron SP, Freeman J, Iyer V, Guo C and Svoboda K. 2015.A Cellular Resolution Map of  
667 Barrel Cortex Activity during Tactile Behavior. *Neuron*, **86**: 783-799. doi:  
668 10.1016/j.neuron.2015.03.027

669 Petersen RS, Panzeri S, and Diamond ME. 2001. Population coding of stimulus location in  
670 rat somatosensory cortex. *Neuron*, **32(3)**: 503-514.doi:10.1016/S0896-6273(01)00481-0

671 Petersen RS, Brambilla M, Bale MR, Alenda A, Panzeri S, Montemurro MA and Maravall  
672 M. 2008. Diverse and temporally precise kinetic feature selectivity in the VPM thalamic  
673 nucleus. *Neuron*, **60**: 890–903. doi: 10.1016/j.neuron.2008.09.041.

674 Petreanu L, Gutnisky D, Huber D, Xu N, O'Connor D, Tian L, Looger L and Svoboda K.  
675 2012. Activity in motor-sensory projections reveals distributed coding in somatosensation.  
676 *Nature*, **489**: 299-303. doi: 10.1038/nature11321.

677 Phillips JR and Johnson KO. 1981. Tactile spatial resolution. III. A continuum mechanics  
678 model of skin predicting mechanoreceptor responses to bars, edges, and gratings. *J*  
679 *Neurophysiol*, **46**: 1204-1225.

680 Pillow JW, Shlens J, Paninski L, Sher A, Litke AM, Chichilnisky EJ and Simoncelli EP.  
681 2008. Spatio-temporal correlations and visual signalling in a complete neuronal population.  
682 *Nature*, **454**: 995-999. doi: 10.1038/nature07140.

683 Poole K, Moroni M, and Lewin GR. 2015. Sensory mechanotransduction at membrane-  
684 matrix interfaces. *Pflügers Archiv-European J Physiol*, **467**: 121-132. doi: 10.1007/s00424-  
685 014-1563-6

686 Quist BW and Hartmann MJ. 2012. Mechanical signals at the base of a rat vibrissa: the effect  
687 of intrinsic vibrissa curvature and implications for tactile exploration. *J Neurophysiol*, **107**:  
688 2298–2312. doi: 10.1152/jn.00372.2011.

689 Quist BW, Seghete V, Huet LA, Murphey TD, & Hartmann MJ. 2014. Modelling forces and  
690 moments at the base of a rat vibrissa during noncontact whisking and whisking against an  
691 object. *J Neurosci*, **34(30)**: 9828-9844.



692 Rajan K, Marre O and Tkačik G. 2013. Learning quadratic receptive fields from neural  
693 responses to natural stimuli. *Neural Comp*, **25**: 1661-1692. doi: 10.1162/NECO\_a\_00463.

694 Reinagel P. 2001. How do visual neurons respond in the real world? *Curr Opin Neurobiol*,  
695 **11(4)**: 437-442. doi:10.1016/S0959-4388(00)00231-2

696 Rice FL, Mance A and Munger BL. 1986. A comparative light microscopic analysis of the  
697 sensory innervation of the mystacial pad. I. Innervation of vibrissal follicle-sinus complexes.  
698 *J Comp Neurol*, **252(2)**: 154-174. doi: 10.1002/cne.902520203

699 Simoncelli EP and Olshausen BA. 2001, Natural image statistics and neural representation,  
700 *Ann Rev Neurosci*, **24**: 1193-1216. doi: 10.1146/annurev.neuro.24.1.1193.

701 Sofroniew NJ, Cohen JD, Lee AK, and Svoboda K. 2014. Natural whisker-guided behavior  
702 by head-fixed mice in tactile virtual reality. *J Neurosci*, **34**: 9537-9550. doi:  
703 10.1523/JNEUROSCI.0712-14.2014.

704 Solomon JH and Hartmann MJZ. 2006. Biomechanics: robotic whiskers used to sense  
705 features. *Nature*, **443**: 525-525. doi: 10.1038/443525a.

706 Szwed M, Bagdasarian K and Ahissar E. 2003. Encoding of vibrissal active touch. *Neuron*,  
707 **40**: 621–630. doi:10.1016/S0896-6273(03)00671-8.

708 Szwed M, Bagdasarian K, Bluenfeld B, Barak O, Derdikman D and Ahissar E. 2006.  
709 Responses of trigeminal ganglion neurons to the radial distance of contact during active  
710 vibrissal touch. *J Neurophysiol*, **95**: 791-802. doi: 10.1152/jn.00571.2005.

711 Truccolo W, Eden UT, Fellows MR, Donoghue JP and Brown EN. 2005. A point process  
712 framework for relating neural spiking activity to spiking history, neural ensemble, and  
713 extrinsic covariate effects. *J Neurophysiol*, **93**: 1074–1089. doi: 10.1152/jn.00697.2004.

- 714 Whiteley SJ, Knutsen PM, Matthews DW and Kleinfeld D. 2015. Deflection of a vibrissa  
715 leads to a gradient of strain across mechanoreceptors in a mystacial follicle. *J Neurophysiol*,  
716 **66**: 67. doi: 10.1152/jn.00179.2015.
- 717 Woo S-H et al. 2014. Piezo2 is required for Merkel-cell mechanotransduction. *Nature*, **509**:  
718 622-626. doi:10.1038/nature13251.
- 719 Yarbus AL. 1967. Eye movements and vision. New York: Plenum Press.
- 720 Yu C, Derdikman D, Haidarliu S and Ahissar E. 2006. Parallel thalamic pathways for  
721 whisking and touch signals in the rat. *PLoS Biol*, **4**, e124. doi: 10.1371/journal.pbio.0040124
- 722 Zucker E and Welker WI. 1969. Coding of somatic sensory input by vibrissae neurons in the  
723 rat's trigeminal ganglion. *Brain Res*, **12**: 138-156. doi:10.1016/0006-8993(69)90061-4

**Figure 1. Electrophysiological recording from single primary whisker units in awake, head-fixed mice and simultaneous measurement of whisker kinematics/mechanics.**

**A.** Schematic of the preparation, showing a tungsten microelectrode array implanted into the trigeminal ganglion of head-fixed mouse, whilst a metal pole is presented in one of a range of locations (arrows). Before the start of each trial, the pole was moved to a randomly selected, rostral-caudal location. During this time, the whiskers were out of range of the pole. At the start of the trial, the pole was rapidly raised into the whisker field, leading to whisker-pole touch. Whisker movement and whisker-pole interactions were filmed with a high-speed camera.

**B and C.** Kinematic (whisker angle  $\theta$ ) and mechanical (whisker curvature  $\kappa$ , moment  $\vec{M}$ , axial force  $\vec{F}_{ax}$  and lateral force  $\vec{F}_{lat}$ ) variables measured for the principal whisker in each video frame. When a whisker pushes against an object during protraction (as in panel **D**, red and cyan frames), curvature increases; when it pushes against an object during retraction (as in panels **B** and **C**), it decreases.

**D.** Individual video frames during free whisking (yellow and green) and whisker-pole touch (red and cyan) with tracker solutions for the target whisker (the principal whisker for the recorded unit, panel **E**) superimposed (coloured curve segments).

**E.** Time series of whisker angle, push angle and curvature change, together with simultaneously recorded spikes (black dots) and periods of whisker-pole contact (red bars). Coloured dots indicate times of correspondingly coloured frames in **D**.

**Figure 2. Primary whisker neurons encode whisker curvature, not whisker angle, during active sensation.**

**A.** Schematic of the Generalized Linear Model (GLM).

**B.** For an example unit, whisker angle (top panel), whisker curvature change (middle panel) and simultaneously recorded spike train (bottom panel, black), together with predicted spike trains for the best-fitting angle GLM (bottom panel, orange) and curvature change GLM (bottom panel, blue). Spike trains discretized using 1 ms bins and smoothed with a 100 ms boxcar filter. Prediction performance (Pearson correlation coefficient, PCC) for this unit was 0.59. Inset shows tuning curves for both GLMs, computed by convolving the relevant sensory time series (angle or curvature change) with the corresponding GLM stimulus filter to produce a time series of filter coefficients, and estimating the spiking probability as a function of filter coefficient (25 bins).

**C.** Analogous to panel **B.** for a second example unit. Prediction performance PCC for this unit was 0.74.

**D.** Prediction performance between predicted and recorded spike trains) compared for GLMs fitted with three different types of input: curvature change alone; angle alone; both curvature change and angle. Each blue/orange/green dot is the corresponding PCC for one unit: large black dots indicate median; error bars denote inter-quartile range (IQR). To test statistical significance of each unit's PCC, the GLM fitting procedure was repeated 10 times on spike trains subjected each time to a random time shift: magenta dots show these chance PCCs for the unit indicated by the magenta circle; the mean chance PCC was computed for each unit and the large gray dot shows the median across units. Black circles indicate units whose PCC was significantly different to chance (signed-rank test, Bonferroni corrected,  $p < 0.0025$ ). To

770 facilitate direct comparison between results for curvature change GLM and angle GLM, these  
771 are re-plotted in the inset.

772 **E. Left.** Firing rate during touch episodes compared to that during non-touch episodes for  
773 each unit, compared to corresponding predicted firing rates from each unit's curvature change  
774 GLM. **Right.** Medians across units: error bars denote IQR; \* denotes differences significant  
775 at  $p < 0.05$  (signed-rank test).

776 **Figure 3. Primary whisker neurons encode whisker angular acceleration during free**  
777 **whisking**

778 **A.** Mean response of an example whisking-sensitive unit to whisking amplitude, computed  
779 during non-contact episodes (dark green, shaded area shows SEM) with regression line  
780 (black). Inset shows regression line slopes (median and IQR) for whisking sensitive (green)  
781 and non-whisking sensitive (grey) units. \* indicates statistically significant rank-sum test  
782 ( $p = 0.05$ ).

783 **B.** Mean response of two example units as a function of angular acceleration. The dark brown  
784 unit is the same as that shown in A.

785 **C.** Mean response of two example units as a function of whisking phase. The dark pink unit  
786 is the same as that reported in A; the light pink unit is the same as that shown as light brown  
787 in B.

788 **D.** Excerpt of free whisking (**orange**) along with activity of an example, whisking-sensitive  
789 unit (black) and activity predicted by a GLM driven by angular acceleration (brown). The  
790 unit is the same as that shown in A.

791 **E.** GLM prediction accuracy (PCC) for all whisking sensitive (brown) and whisking  
792 insensitive units (grey). Bars and vertical lines denote median and IQR respectively.

793 **Figure 4. Whisker angle and whisker curvature change are highly correlated during**  
 794 **passive whisker deflection, but decoupled during active touch.**

795 **A.** Whisker angle (**top**) and whisker curvature change (**bottom**) time series, due to passive,  
 796 trapezoidal stimulation of C2 whisker in an anaesthetized mouse, estimated as mean over 10  
 797 repetitions. Note that error bars (showing SEM) are present but very small.

798 **B.** Corresponding data for low-pass filtered white noise (hereafter abbreviated to ‘white  
 799 noise’) stimulation of the same whisker.

800 **C.** Cross-correlation between curvature change and angle during white noise stimulation, for  
 801 C2 whisker.

802 **D.** Cross-correlation between angle and curvature change at zero lag, for both passive  
 803 stimulation under anaesthesia and awake, active sensing (median of absolute cross-  
 804 correlation for each unit; error bar denotes IQR).

805 **E.** Joint distribution of whisker angle and whisker curvature change in awake, behaving mice  
 806 (1 ms sampling). Different colours denote data corresponding to different recorded units.  
 807 **Inset:** Analogous plot for passive, white noise whisker deflection in an anaesthetised mouse.  
 808 Different colours indicate data from different whiskers.

809 **F.** Joint distribution of angle and curvature change for an example recording from an awake  
 810 behaving mouse, with samples registered during touch and non-touch distinguished by colour  
 811 (1 ms sampling).

812 **G.** Touch data of **F** classified according to pole position (dot colour).

813

814

## 815 SUPPLEMENT

### 816 **Figure 1-figure supplement 1. Electrophysiological recording from trigeminal primary** 817 **neurons of awake, head-fixed mice.**

818 Extracellular potential recorded from the same single unit during both anaesthetized and  
819 awake epochs. Spikes belonging to the cluster of the target unit are shown by black triangles.  
820 Inset shows overlay of all waveforms belonging to this cluster.

821

### 822 **Video 1: Video of an awake mouse, exploring a pole with its whiskers with simultaneous** 823 **electrophysiological recording of a primary whisker neuron**

824 At the start of the video, the pole is out of range of the whiskers. Whisker tracker solution for  
825 the principal whisker of the recorded unit is overlaid in red. White dots represent spikes;  
826 orange trace shows whisker angle (scale bar = 40 °); blue trace shows whisker curvature  
827 change (scale bar = 0.05 mm<sup>-1</sup>). Video was captured at 1000 frames/s and is played back at  
828 50 frames/s. Related to Figure 1.

829

### 830 **Figure 1- figure supplement 3. Computation of axial and lateral contact forces.**

831 Axial ( $F_{ax}$ ) and lateral ( $F_{lat}$ ) force components at the whisker base were calculated, in each  
832 video frame where there were whisker-pole contacts, as follows (Pammer et al. 2013). First,  
833 the point of whisker-pole contact was located (Experimental Procedures). The direction of  
834 the force  $\vec{F}$  was then calculated as the normal to the whisker tangent at the contact point  
835 (Pammer et al. 2013). Moment at the base  $M$  was calculated from the whisker curvature at

836 the base (Material and Methods) and then the magnitude  $F$  of  $\vec{F}$  was derived from the  
837 definition of moment:

$$F = \frac{M}{r \sin(\varphi)}$$

838

839 where  $r$  is the magnitude of the lever arm vector  $\vec{r}$  from whisker base to contact point, and  $\varphi$   
840 is the angle between  $\vec{r}$  and  $\vec{F}$ . The components  $F_{ax}$  and  $F_{lat}$  were then found by projecting  $\vec{F}$   
841 onto the tangent and normal to the whisker at its base, respectively:

$$842 \quad F_{ax} = F \sin(\theta_{base} - \theta_{contact}),$$

$$843 \quad F_{lat} = F \cos(\theta_{base} - \theta_{contact}).$$

844 Here  $\theta_{base}$  is the angle between the tangent to the whisker at its base and the horizontal;

845  $\theta_{contact}$  is the angle between  $\vec{F}$  and the horizontal.

846

847

848

849

850

851

852

853

854



855 **Figure 2- figure supplement 1. Effect on GLM performance of quadratic input terms,**  
 856 **simulated repeated trials and minimal stimulus filters**

857 **A.** Angle GLM prediction performance is robust to addition of quadratic stimulus-  
 858 dependence. Prediction accuracy (PCC) for standard angle GLM (same data as Figure 2C of  
 859 main text) in comparison to quadratic GLM (see Material and Methods). Black dots denote  
 860 medians, error bars IQR.

861 **B.** Single-trial GLM prediction accuracy is limited by neuronal response variability.  
 862 Prediction accuracy (PCC) for simulated neurons. Each simulated neuron is the best-fitting  
 863 GLM, based on instantaneous curvature change, for its corresponding recorded unit (see  
 864 Material and Methods). Prediction accuracy is quantified both using the single-trial approach  
 865 of the main text and using a repeated-trial method only possible by virtue of using a  
 866 simulation. Black dots denote medians, error bars IQR.

867 **C.** Prediction accuracy of curvature-based GLMs is accounted for by tuning to instantaneous  
 868 curvature change. A GLM performs a temporal filtering operation on its sensory stimulus  
 869 input and the sensory feature(s) which it encodes is determined by this ‘stimulus filter’. The  
 870 stimulus filters can, in principle, be complex, but we found that the ability of a GLM to  
 871 predict spikes (**lower left**) from curvature change was fully explained by the simple case  
 872 where the action of the stimulus filter is simply to multiply the sensory input by a gain factor  
 873 (median 0.55, IQR 0.26-0.66;  $p=0.35$  signed-rank test). Recorded spike train (**upper left**) and  
 874 curvature-predicted spike trains (**lower left**) both for a ‘curvature history’ GLM with a length  
 875 5 stimulus filter identical to Figure 2D of main text and for an ‘instantaneous curvature’  
 876 GLM with a length 1 stimulus filter. Data for unit 2 of main text Figure 2C. Prediction  
 877 accuracy of the curvature history GLM compared to that of the instantaneous curvature GLM  
 878 for every recorded unit (**right**).

879 **D.** Tuning curves for curvature change (blue) and angle (orange) of unit 1 and unit 2 in  
880 Figure 2.

881

882 **Figure 2- figure supplement 2. Moment is near-perfectly correlated with axial/lateral**  
883 **contact force components during pole exploration.**

884 **A.** Two example time series for simultaneously measured whisker angle, bending moment,  
885 lateral force and axial force (see Material and Methods). Red bars indicate episodes of  
886 whisker-pole contact.

887 **B.** Joint distribution of bending moment and lateral force (**left**), compared to that of bending  
888 moment and axial force (**right**), for the same recording shown in **A**. Moment was highly  
889 linearly correlated with lateral force (median absolute correlation coefficient across units  
890 0.995, IQR 0.99-1.00, median  $R^2$  of linear fit 0.99, IQR 0.97-1.00), and highly quadratically  
891 correlated with axial force (median  $R^2$  of quadratic fit 0.94, IQR 0.85-0.98). This indicates  
892 that, during our conditions of pole exploration, axial force and lateral force are both  
893 redundant with moment

894 **Figure 2- figure supplement 3. Example filters for curvature-based GLMs.**

895 Stimulus filter, history filter and bias term of curvature-based GLMs for two units (**A** and **B**),  
896 fitted as described in Material and Methods. Both units had negative history filters (in the 2  
897 ms preceding a spike), consistent with refractoriness. The stimulus filter of unit B was  
898 negative (in the 5 ms preceding a spike), indicating sensitivity to negative curvature change.  
899 The stimulus filter of unit A was biphasic, but with positive integral, indicating sensitivity  
900 both to positive curvature change and to positive curvature change derivative. Under our  
901 stimulus conditions, dominated by slow (~100 ms) time-scale whisker-pole interactions, the

902 former effect was dominant; derivative-sensitivity had relatively little impact on spike

903 prediction.

904

905 **Figure 3- figure supplement 1. Whisking-sensitive units exhibit heterogeneous**  
 906 **selectivity to angular acceleration.**

907 For each whisker-sensitive unit, an acceleration tuning curve was estimated (Figure 3B).  
 908 Tuning to positive (negative) acceleration was quantified by the slope of a regression line  
 909 fitted to the positive (negative) acceleration half of the tuning curve. In general, units  
 910 responded to both positive and negative accelerations but to different degrees. Statistical  
 911 tests, based on regression coefficients, detailed in Material and Methods, were used to  
 912 differentiate the different types of unit.

**Figure 4-figure supplement 1: Correlations between angle and curvature change during passive whisker stimulation can make curvature-tuned units appear angle-tuned.**

The data of Figure 4 show a strong correlation between whisker angle and whisker curvature during passive stimulation of the whisker. To test whether this correlation might make curvature-tuned units appear angle-tuned, we used a simulation approach. This allowed us to generate responses from idealised neurons whose true tuning was known, by construction, to be only to curvature. We simulated responses of such neurons to the curvature change time series obtained from passive white noise stimulation (**A1-2**). We then trained a GLM to predict these curvature-evoked spikes using only whisker angle as input (**A3-A4**). Despite being fed the ‘wrong’ input, this GLM was able to predict the spikes accurately (for C2 whisker, angle PCC was 0.90, curvature change PCC 0.94; results similar for C5; **C**). This result was robust to different choices of feature tuning (**B-C**).

**A1.** Whisker curvature change caused by the white noise stimulus applied to C2 whisker of an anaesthetized mouse (same data as main text Figure 3, repeated for clarity).

**A2.** Spike train evoked by a simulated curvature-tuned neuron in response to the stimulus in A1 (a GLM with the position filter shown in left panel of A5).

**A3.** Whisker angle time series corresponding to panel A1.

**A4.** Target response (black) compared to predicted response from best-fitting GLMs using either angle (orange) or curvature change (blue) as input.

**A5. Left.** Stimulus filter used to generate the spike train of panel A2. **Middle-Right.** Best-fitting stimulus filters (normalised to unit length) for GLMs trained on the spikes of panel A2 and the angle time series of panel A3 or the curvature change time series of panel A1 respectively.

936 **B1-5.**Results analogous to A1-5 for a simulated neuron tuned to curvature velocity.

937 **C.** Quantification of the GLM predictions shown in panels A4-B4.

938

939 **Figure 4-figure supplement 2. Measurement of whisker bending during passive whisker**  
 940 **deflection.**

941 **A.** Four video frames taken during trapezoidal, passive whisker stimulation with whisker tracker  
 942 solutions overlaid (coloured lines).

943 **B.** Curvature change (left) and corresponding tracker solutions (right) during a 45 ms episode.  
 944 Coloured dots mark the times of the example frames in panel A and shading from blue to aqua  
 945 indicates curvature change. This whisker has negative intrinsic curvature. As the actuator applies  
 946 force to the whisker, the whisker straightens up and the curvature increases.

947

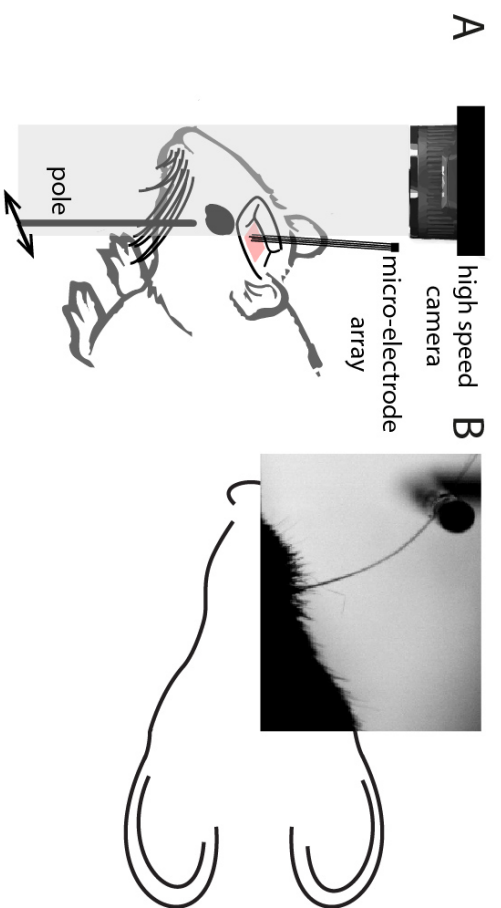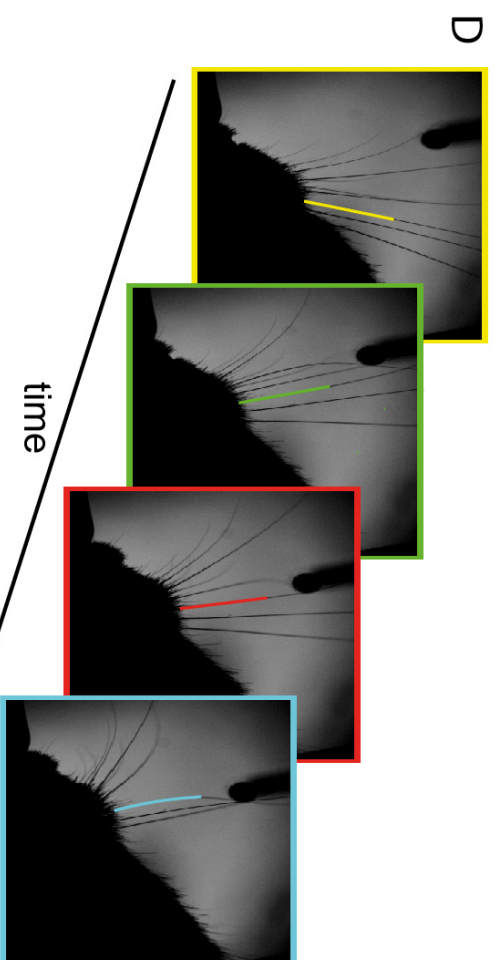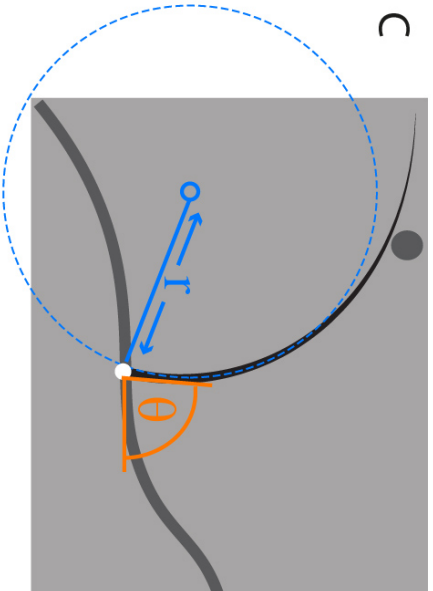

Curvature ( $\kappa$ ) =  $1/r$   
Angle ( $\theta$ )

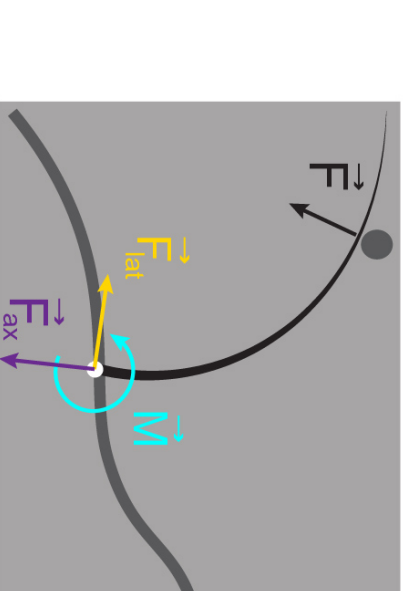

Lateral Force ( $\vec{F}_{lat}$ )  
Axial Force ( $\vec{F}_{ax}$ )  
Contact Force ( $\vec{F}$ )  
Moment ( $\vec{M}$ )

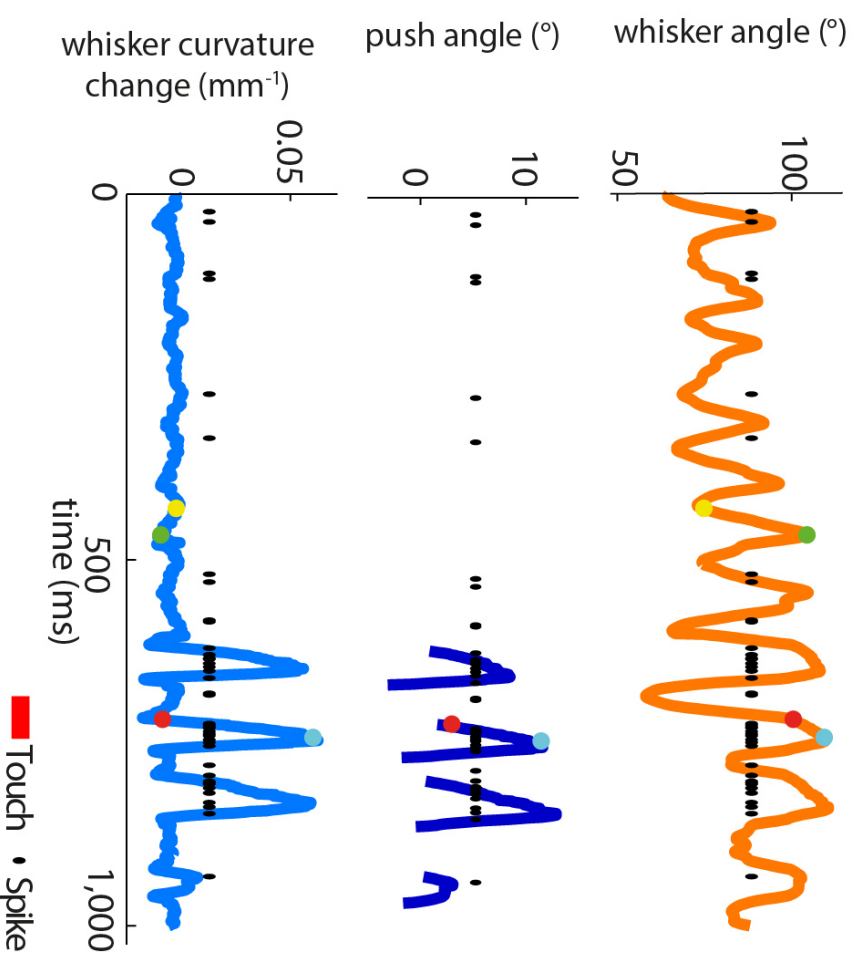

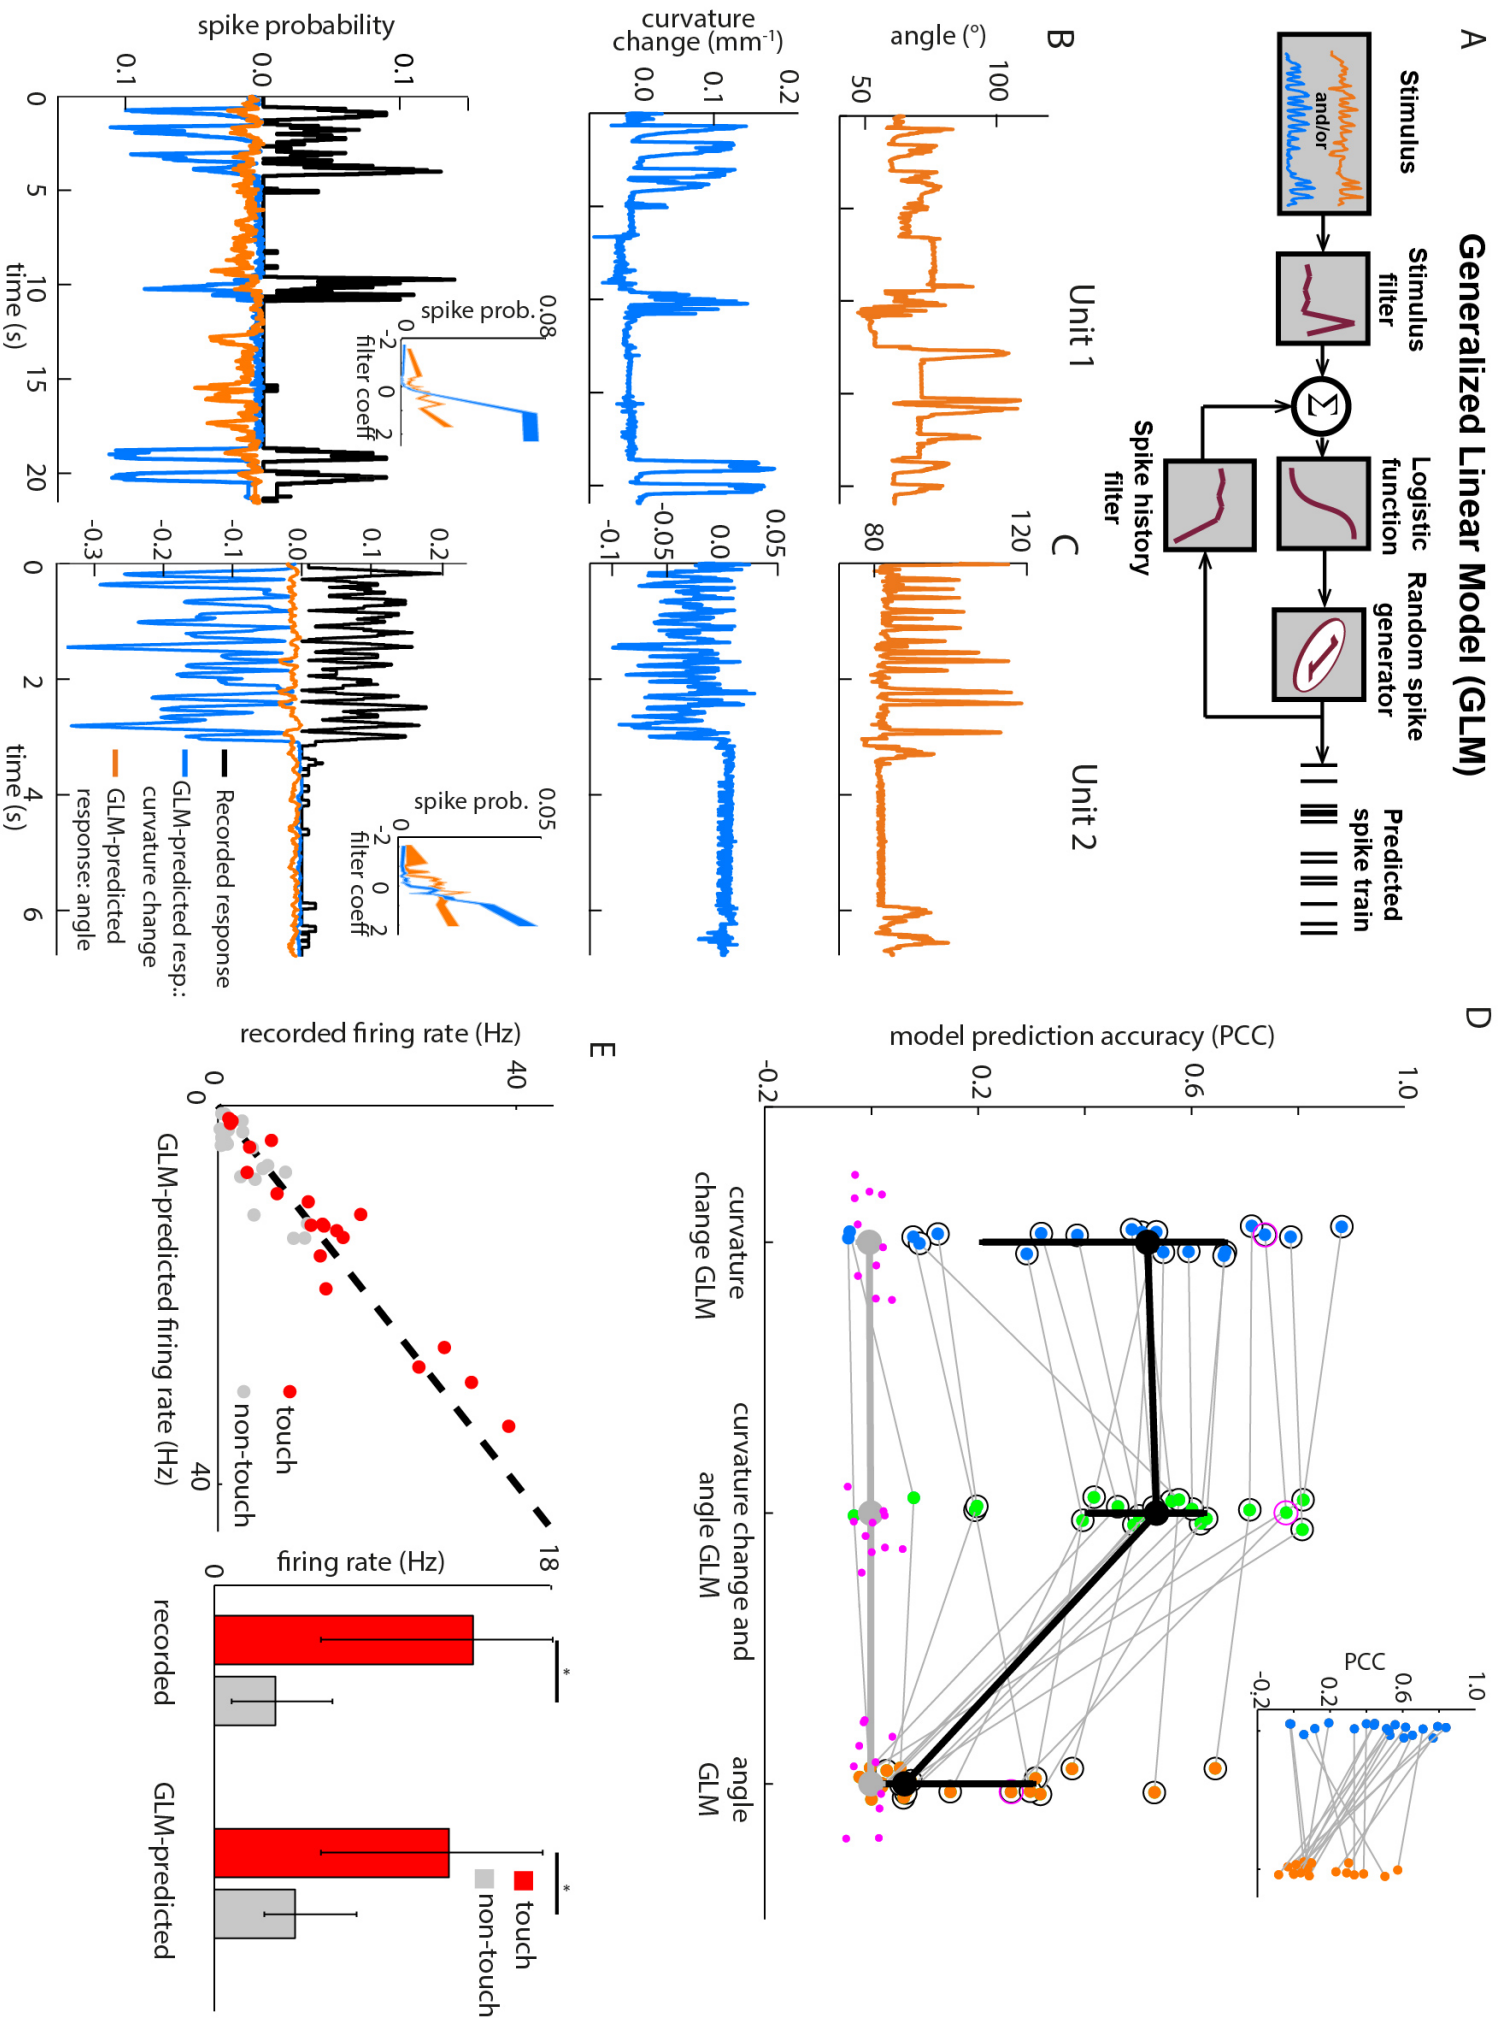



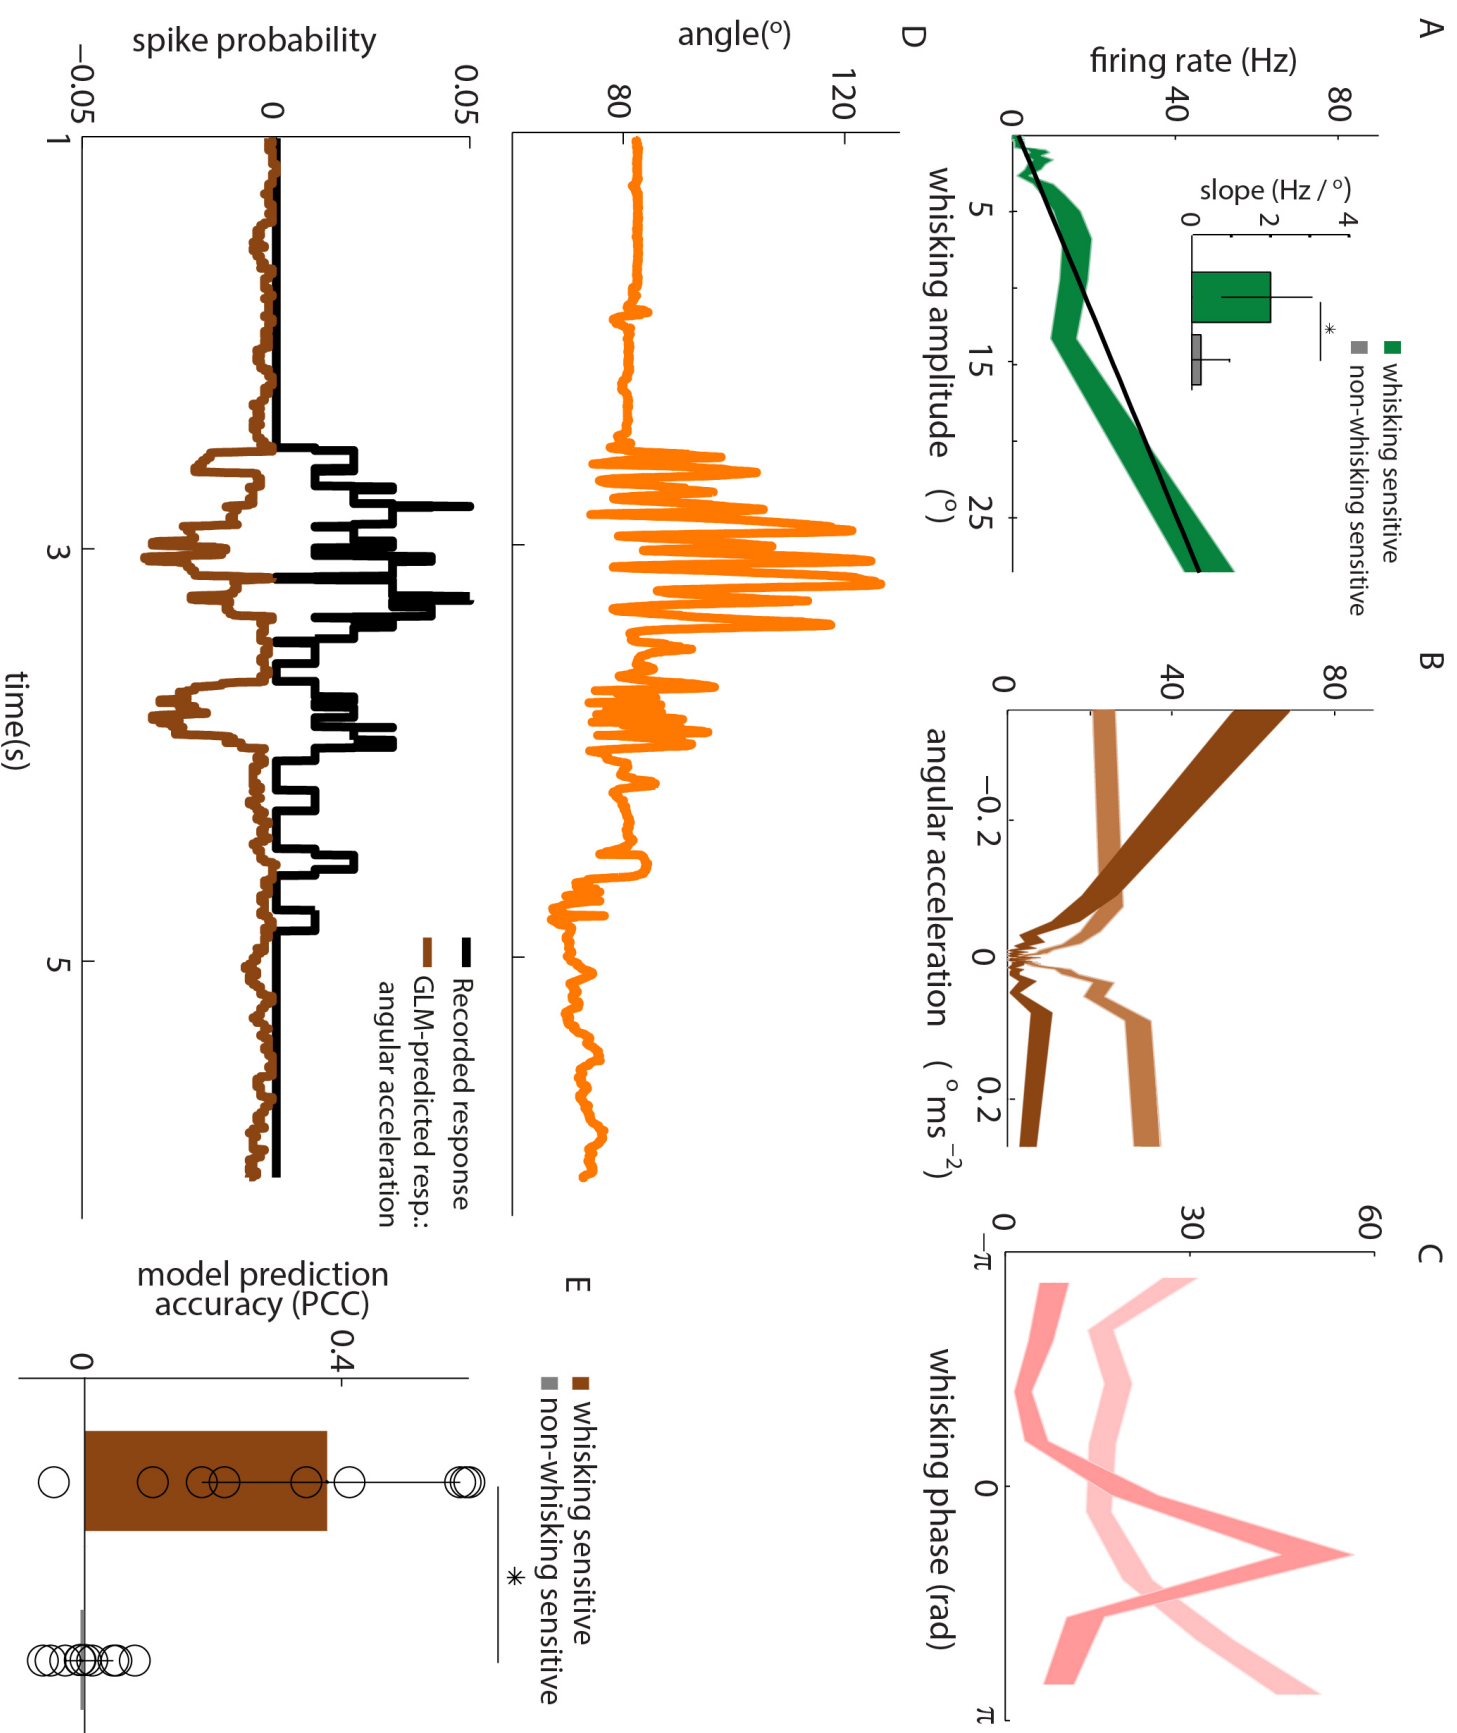

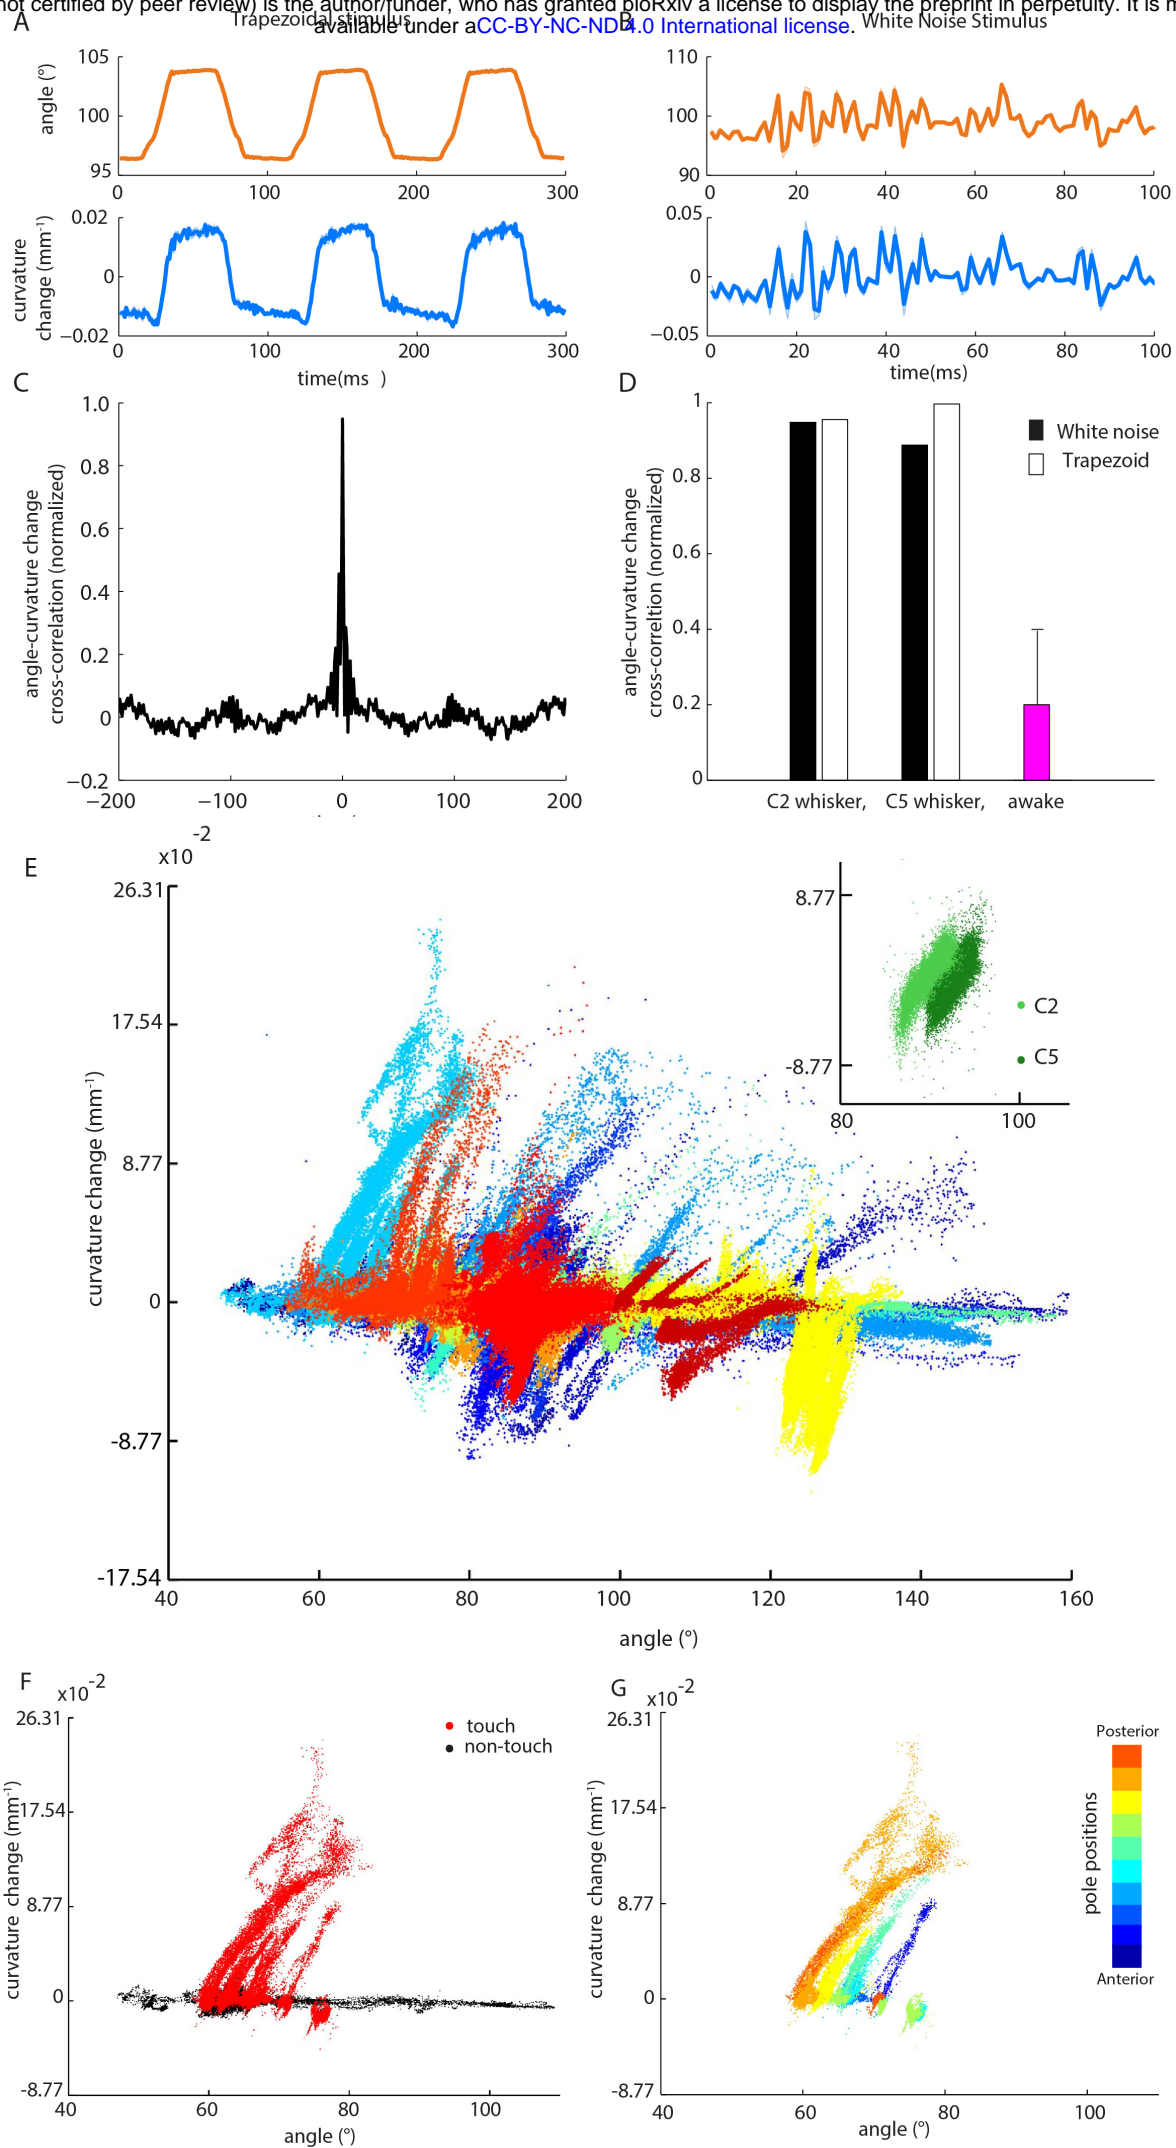

Source: http://biorxiv.org/content/10.1101/024364v4.full.pdf
